# Supplementary material for: The effect of religiosity on violence: Results from a Brazilian population-based representative survey of 4,607 individuals
Source: PLoS One. 2020 Aug 25;15(8):e0238020. doi: 10.1371/journal.pone.0238020 (PMC7447020; doi:10.1371/journal.pone.0238020)
Supplement: S1 Data — (XLSX) [file pone.0238020.s001.xlsx]

## Sheet: Database
Sex	Age	Marital status	Race	Brazilian regions	Involvement in fights	Police detention	Domestic violence	Social suport	Depression	Alcohol dependence	Religious affiliation	Importance of religion
1	48	0	1	3	0	0		1	0	0	1	1
2	58	1	1	3	0	0	0	0	0	0	1	1
2	35	0	1	2	0	0		1	1	0	0	0
2	49	1	5	1	0	0	0	1	0	0	1	1
1	17	0	1	5	0	0		1	0	0	1	1		Legend in the next sheet
2	32	1	2	2	0	0	0	0	0	0	1	1
2	17	0	3	2	0	1		1	0	0	1	1
1	51	1	3	2	0	0	0	0	0	0	1	1
1	46	1	1	2	0	0	0	1	0	0	1	0
2	34	0	1	3	0	0		1	1	0	1	1
1	16	0	2	3	1	1		0	1	0	1	1
2	32	0	3	2	0	0		1	1	0	1	1
1	33	1	3	1	0	0	0	1	0	0	1	1
2	79	0	3	3	0	0		0	0	0	1	1
1	81	0	1	3	0	0		1	0	0	1	1
2	38	0	2	3	0	0		0	0	0	0	0
2	26	1	1	4	0	0	0	0	1	1	1	0
1	37	0	1	2	0	0		0	1	0	1	0
2	17	0	1	4	0	0		1	0	0	1	0
2	37	1	3	4	0	0	0	1	1	0	1	1
2	58	1	1	3	0	0	0	1	0	0	1	1
2	26	1	1	1	0	0	0	1	0	0	1	0
2	27	1	1	3	0	0	0	1	0	0	1	1
2	50	0	1	4	0	0		0	0	0	1	1
1	15	0	3	2	0	0		1	0	0	0	0
2	25	1	1	4	1	0	0	1	1	0	1	1
2	24	1	1	3	0	0	1	1	1	0	1	1
2	90	0	1	3	0	0		0	1	0	1	1
2	24	1	1	3	0	0	0	0	0	0	1	0
2	50	0	1	2	0	0		0	0	0	1	1
2	20	1	1	3	0	0	1	0	0	0	1	1
1	34	0	1	3	0	0		1	0	0	1	0
1	14	0	3	3	1	0		1	0	0	1	0
1	31	1	3	3	0	0	0	1	0	0	0	0
2	34	1	1	3	0	0	0	0	0	0	1	1
1	46	1	3	2	0	0	0	1	0	0	1	0
2	48	0	3	2	0	0		1	0	0	1	1
1	16	0	3	5	0	1		1	1	0	0	0
1	35	1	3	2	0	0	0	1	1	0	1	1
1	20	0	3	2	1	0		1	0	0	0	0
1	25	0	1	3	1	0		0	1	0	1	0
1	53	1	1	4	0	0	0	0	1	0	1	1
2	46	1	1	4	0	0	0	0	1	0	1	1
2	26	0	3	2	0	0		1	0	0	1	1
2	43	1	3	3	0	0	1	0	1	0	0	0
1	69	1	3	2	0	0	0	1	0	0	1	1
2	66	1	2	3	0	0	0	1	0	0	1	1
2	32	1	3	3	0	0	0	0	0	0	1	1
1	54	1	3	2	0	0	0	1	0	1	0	0
2	19	0	4	2	0	0		0	0	0	1	1
2	34	1	3	4	0	0	1	1	1	0	1	1
2	18	1	3	1	0	0	1	1	0	0	1	1
2	79	0	1	1	0	0		1	1	0	1	1
1	70	1	1	4	0	0	0	1	0	0	1	1
1	16	0	1	4	0	0		0	0	0	1	1
2	14	0	1	2	0	0		1	0	0	1	1
2	44	1	3	2	0	0	0	1	0	0	1	1
2	35	0	3	3	0	0		1	0	0	1	0
1	16	0	1	3	0	0		0	0	0	0	0
2	60	0	1	3	0	0		1	0	0	1	1
2	75	0	3	3	0	0		1	0	0	1	1
2	17	0	1	3	0			1		0	1	1
2	51	0	3	1	0	0		0	1	0	1	1
2	33	0	1	3	0	0		1	0	0	1	1
1	17	0	1	3	0	0		1	0	0	1	0
2	37	1	1	4	0	0	0	0	0	0	1	0
2	30	1	1	3	0	0	1	0	0	0	1	1
1	36	1	3	3	0	0	0	1	0	1	1	1
2	65	1	1	3	0	0	0	1	0	0	1	1
1	14	0	3	2	0	0		0	0	0	1	1
1	15	1	1	3	1	0	0	1	0	0	1	1
2	53	1	3	2	0	0	0	1	0	0	1	1
1	19	0	1	3	0	0		1	0	0	1	1
1	33	0	2	3	0	0		0	1	0	1	1
1	23	1	1	2	0	0	0	1	0	0	1	1
1	14	0	1	4	0	0		0	0	0	1	1
1	41	1	3	3	0	0	0	1	0	0	1	0
2	24	1	1	4	0	0	0	1	0	0	1	1
2	75	0	2	2	0	0		1	0	0	1	1
1	14	0	1	4	0	0		1	0	0	1	1
2	62	0	2	2	0	0		1	0	0	1	1
2	28	1	99	3	0	0	0	1	0	0	1	1
2	83	0	2	2	0	0		0		0	1	1
2	34	1	1	3	0	0	0	0	1	0	1	1
2	37	1	2	3	0	0	0	1	0	0	1	1
2	56	1	1	4	0	0	0	0	0	0	1	1
2	25	0	3	1	0	0		1	1	0	1	1
2	28	1	1	3	0	0	0	1	1	0	1	1
2	18	0	2	3	0	0		1	1	0	1	1
1	18	0	1	3	0	0		1	0	1	1	1
2	52	0	2	3	0	0		0	1	0	1	1
2	16	1	1	1	0	0	1	1	0	0	0	0
1	18	0	1	3	0	0		1	1	0	0	0
1	22	0	3	2	0	0		0	0	0	0	0
2	49	1	1	3	0	0	0	1	0	1	1	1
1	50	1	1	3	0	0	0	1	0	0	1	1
2	71	0	1	2	0	0		1	0	0	1	1
2	35	1	3	3	0	0	0	0	1	0	1	1
1	18	0	3	2	0	0		1	0	0	1	1
1	14	0	5	1	0	0		1	0	0	1	1
1	65	0	2	2	0	0		1	1	0	1	1
1	81	0	3	3	0	0		0	0	0	1	0
1	15	0	3	2	0	0		1	0	0	1	1
2	86	0	5	2	0	0		0	1	0	1	1
1	42	0	1	2	0	0		0	1	0	1	1
2	21	0	1	4	0	0		1	0	0	1	1
1	25	1	1	3	0	0	0	0	0	0	1	1
1	17	0	3	2	1	0		1	1	0	1	1
2	61	1	1	3	0	0	0	1		0	1	0
1	39	0	3	3	0	0		1	1	1	1	0
2	16	1	3	1	0	0	0	1	1	0	1	1
2	44	0	1	3	0	0		0	0	0	1	1
1	53	0	1	3	0	0		1	0	0	1	1
2	23	1	1	4	0	0	0	1	1	0	1	1
1	41	1	3	5	0	0	0	1	0	0	1	1
2	32	0	3	2	0	0		1	0	0	1	0
1	66	1	1	4	0	0	0	1	0	0	1	1
1	44	1	1	4	0	0	0	1	1	0	1	0
1	65	0	1	1	0	0		1	0	0	1	1
1	17	0	3	1	0	0		1	1	0	1	1
2	35	1	2	1	0	0	0	0	1	0	1	0
1	44	1	1	3	0	1	1	1	1	1	1	1
2	26	1	2	3	0	0	0	1	0	0	1	1
2	47	0	3	3	0	0		1	0	0	0	0
1	15	0	99	4	0	0		1	1	0	1	0
1	49	1	1	4	0	0	0	0	0	0	1	1
2	33	0	3	2	0	0		1	0	0	1	1
1	63	0	1	4	0	0		0	1	0	1	0
2	20	0	3	2	0	0		1	0	0	1	0
2	59	1	1	3	0	0	0	1	0	0	1	0
1	68	1	1	3	0	0	0	1	0	0	1	0
1	44	1	3	2	0	0	0	1	1	0	1	1
1	28	1	3	2	0	0	0	0	1	0	0	0
2	27	0	3	3	0	0		1	1	0	0	0
2	37	0	1	3	0	0		1	0	0	1	0
2	42	1	1	4	0	0	0	1		0	1	1
2	45	1	1	4	0	0	0	1	1	0	1	1
2	14	0	3	3	0	0		1	0	0	0	0
1	64	0	1	4	0	0		0	0	1	1	0
1	26	0	1	2	0	0		0	1	0	1	1
2	25	1	3	1	0	0	0	1	0	0	1	1
1	19	0	3	3	0	0		1	0	0	1	1
2	55	1	3	3	0	0	1	0	1	1	1	1
2	52	0	1	3	0	0		1	0	0	1	1
2	69	1	3	3	0	0	0	1	0	0	1	1
1	79	0	1	3	0	0		1	0	0	1	1
1	24	0	2	2	0	0		0		0	0	0
1	38	1	1	3	1	0	1	0	0	1	1	0
2	14	0	3	2	0	0		1	0	0	1	1
2	14	0	3	3	0	0		1	0	0	1	1
1	56	1	1	3	0	0	0	0	0	0	1	1
2	41	1	5	2	0	0	0	1	1	0	1	1
2	56	1	1	4	0	0	0	1	1	0	1	1
2	20	0	2	3	0	0		1	0	1	1	1
1	30	1	1	4	0	0	0	1	1	0	1	0
2	42	0	3	5	0	0		1	1	0	1	1
2	36	1	3	2	0	0	0	1	0	0	1	1
2	44	1	2	2	0	0	0	0	0	0	0	0
2	17	0	2	3	0	0		0	0	0	1	1
2	49	1	1	3	0	0	0	1	0	0	1	1
1	16	0	1	4	0	0		1	0	0	1	1
1	17	0	3	4	0	0		1	0	0	1	1
1	21	0	1	2	0	0		1	0	0	1	0
2	55	1	2	2	0	0	0	0	1	0	1	1
1	74	0	3	3	0	0		1	0	0	1	1
1	64	0	2	3	0	0		0	1	0	1	1
1	48	1	3	2	0	0	0	1	0	0	1	1
1	27	1	1	4	0	0	0	1	0	0	1	0
2	33	1	2	3	0	0	0	1	0	0	1	1
2	47	0	3	3	0	0		1	0	0	1	1
1	31	1	3	3	0	0	0	1	0	0	1	1
2	16	0	3	5	0	0		1	0	0	0	0
1	77	1	1	5	0	0	0	0	1	0	1	1
2	61	1	1	4	0	0	0	1	0	0	0	0
1	64	1	1	3	0	0	0	0	1	0	1	1
1	26	0	3	2	0	0		1	0	0	1	1
2	24	1	1	3	0	0	0	1	0	0	0	0
1	60	0	1	3	0	0		0	0	0	1	1
2	75	0	1	3	0	0		1	0	0	1	1
2	22	0	1	3	0	0		1	1	0	1	1
2	20	1	1	2	0	0	0	1	0	0	1	1
2	37	1	1	4	0	0	0	0	0	0	1	1
2	29	0	1	3	0	0		1	0	0	1	1
2	69	0	1	2	0	0		0	0	0	1	1
1	64	1	3	2	0	0	0	0	0	0	1	1
2	25	1	1	2	0	0	0	1	0	0	0	0
2	29	1	3	2	0	0	0	1	0	0	1	1
1	38	0	3	3	0	0		1	1	0	1	1
1	14	0	3	3	0	0		1	0	0	1	1
2	26	1	3	3	0	0	1	1	1	0	1	1
2	22	1	3	2	0	0	0	1	0	0	1	1
1	18	0	3	2	0	0		1	0	0	1	1
2	28	1	1	3	0	0	0	0	0	0	1	0
1	60	1	1	4	0	0	0	1	0	0	1	1
2	28	1	1	3	0	0	1	0	0	0	1	1
1	32	1	3	2	0	0	0	1	0	0	1	1
2	52	1	1	4	0	0	0	1	0	1	1	1
1	72	1	3	3	0	0	0	0		0	1	0
2	15	0	1	3	0	0		1	1	0	1	1
2	16	0	3	3	0	0		1	0	0	0	0
1	63	1	3	3	0	0	0	0	0	0	1	0
1	27	0	2	3	0	0		1	0	0	1	1
2	43	1	3	1	0	0	0	1	1	0	1	1
1	15	0	3	2	0	0		0	1	0	1	1
2	18	0	3	2	0	0		1	0	0	1	1
1	76	0	1	3	0	0		0	1	0	1	0
2	53	0	3	3	0	0		0	0	0	0	0
1	40	1	1	1	0	0	0	1		0	1	1
2	23	1	2	2	0	0	0	0	0	0	1	1
2	57	1	1	3	0	0	0	1	1	0	1	1
2	40	1	3	3	0	0	0	0	1	0	1	1
1	17	0	3	5	0	0		1	0	0	1	1
1	67	1	3	3	0	0	0	0	0	0	1	1
1	28	1	3	3	0	0	0	1	0	0	1	1
2	22	0	1	1	0	0		1	0	0	1	1
2	34	1	3	3	0	0	0	1	0	0	1	1
2	62	0	1	2	0	0		1	0	0	1	1
1	43	1	3	2	0	0	0	1	0	0	1	1
1	15	0	1	4	0	0		1	0	0	1	1
2	15	0	1	3	0	0		1	0	0	1	1
2	14	0	1	2	0	0		1	0	0	1	1
2	55	1	3	3	0	0	0	1		0	1	1
2	31	0	1	2	0	0		0	0	0	0	0
2	35	0	3	2	0	0		1	1	0	1	1
1	38	0	2	1	0	0		1	0	0	1	1
2	34	1	1	4	0	0	0	1	0	0	1	1
2	58	1	2	2	0	0	0	0	0	0	1	1
1	14	0	3	3	0	0		1	0	0	0	0
1	34	0	5	2	0	0		1	1	0	1	1
2	53	1	3	3	0	0	0	1	1	0	1	1
2	15	0	3	3	0	0		0	1	0	1	1
1	20	1	2	5	0	0	0	1	0	0	1	1
1	14	0	2	3	0	0		1	0	0	1	1
2	50	0	3	2	0	0		1	0	0	0	0
1	52	1	2	3	0	0	0	1	0	0	1	0
2	45	0	3	3	0	0		1	0	0	1	1
2	14	0	1	3	0	0		1	0	0	1	1
1	16	0	1	4	0	0		0	0	0	1	0
2	17	0	1	3	0	0		0	0	0	1	1
2	79	0	1	3	0	0		1	1	0	1	1
2	40	1	1	3	1	0	1	1	1	0	1	0
1	33	0	1	1	0	0		1	0	0	1	0
2	28	0	3	2	0	1		1	0	0	1	0
2	74	1	3	2	0	0	0	1	0	0	1	1
1	22	0	1	3	0	0		1	0	0	1	1
1	23	0	1	3	0	0		1	0	0	1	1
1	20	0	1	3	0	0		0	0	0	1	1
1	24	0	1	3	0	0		1	1	0	1	1
2	56	0	1	3	1	0		0	1	0	1	1
2	43	0	5	2	0	0		0	0	0	0	0
2	62	1	4	4	0	0	0	1	0	0	1	1
2	15	0	1	4	0	0		0	0	0	1	1
1	25	0	3	3	0	0		1		0	1	0
2	37	1	1	3	0	0	0	0	0	0	1	1
2	20	1	1	3	0	0	0	1	0	0	1	1
2	69	1	3	3	0	0	0	1	0	0	1	1
2	66	0	3	1	0	0		1		0	1	1
1	34	0	3	3	0	0		1	0	0	1	1
2	66	0	3	3	0	0		1	1	0	1	1
2	61	0	3	3	0	0		1	0	0	1	1
1	56	0	1	5	0	0		0	1	0	1	1
2	16	0	3	1	0	0		1	0	0	1	1
1	77	1	1	3	0	0	0	1	0	0	1	1
1	15	0	1	4	0	0		1	0	0	1	1
1	57	1	1	4	0	0	0	0	0	0	1	1
2	14	0	1	4	0	0		1	0	0	1	1
2	32	1	1	2	0	0	0	1	1	0	1	1
2	66	0	1	3	0	0		1	0	0	1	1
2	36	1	3	3	0	0	0	1	0	0	1	1
2	46	1	1	2	0	0	0	1	1	0	1	1
1	30	1	1	3	0	0	0	1	0	0	1	1
2	39	1	1	1	0	0	0	1	0	0	1	1
2	52	0	3	2	0	0		1	0	0	1	1
1	14	0	3	1	0	0		1	0	0	1	1
2	42	1	1	3	0	0	0	1	0	0	1	1
1	19	0	3	2	0	0		1	0	0	1	1
2	26	1	3	3	0	0	0	1	1	0	1	1
1	36	1	1	3	0	0	0	1	0	0	1	1
2	51	0	1	3	0	0		0	1	0	1	1
1	48	1	3	2	0	0	0	1	0	0	1	1
2	36	1	1	3	0	0	0	1	0	0	1	1
1	45	1	5	3	0	0	0	0	0	0	0	0
2	25	1	3	5	0	0	0	1	0	0	0	0
2	27	1	3	2	0	0	0	1	0	0	1	1
1	59	0	1	1	0	0		0	1	0	1	1
1	42	1	3	1	0	0	0	1	0	0	1	1
1	44	1	1	3	0	0	0	0	0	0	1	0
1	45	1	1	3	0	0	0	1	0	0	1	0
1	83	1	1	3	0	0	0	1	0	0	1	1
1	17	0	1	3	0	0		1	0	0	1	1
2	25	1	3	2	0	0	0	1	0	0	1	1
1	29	1	3	2	0	0	0	1	0	0	1	1
1	68	0	2	5	0	0		0	0	0	1	1
2	34	0	1	3	0	0		0	1	0	1	1
2	29	0	2	2	0	0		0	0	0	0	0
2	14	0	3	3	0	0		0	1	0	1	1
1	15	0	3	2	0	0		1	0	0	0	0
2	70	0	3	2	0	0		1	1	0	1	1
2	22	0	1	3	0	0		1	0	0	1	1
2	22	1	3	3	0	0	0	1	0	0	1	1
1	33	0	3	2	0	0		1	0	0	1	1
1	40	1	3	3	0	0	0	1	0	0	1	1
1	42	1	3	3	0	0	0	1	0	0	1	1
1	39	1	2	3	0	0	0	1	0	0	1	1
2	31	1	1	4	0	0	0	1	0	0	1	1
1	65	1	1	3	0	0	0	1	0	0	1	1
1	48	1	1	4	0	0	0	1	0	0	1	0
1	15	0	3	1	0	0		1	0	0	1	1
2	31	0	1	3	0	0		0	0	0	0	0
1	16	0	3	2	0	0		1	1	1	1	1
2	20	1	1	4	0	0	0	1	0	1	1	1
2	50	0	1	3	1	0		0	0	0	1	1
1	57	1	3	1	0	0	1	0	1	0	1	1
1	15	0	3	1	0	0		0	0	0	1	1
1	23	0	3	3	0	0		1	0	1	1	0
2	29	1	1	3	0	0	0	1	1	0	1	1
1	56	1	1	4	0	0	0	1	0	0	1	1
2	32	0	2	3	0	0		1	0	0	1	1
1	51	1	3	2	0	0	0	1	0	0	1	1
2	46	1	2	3	0	0	0	0	0	0	1	1
1	31	1	3	2	0	0	0	1	0	0	1	1
1	17	1	2	2	0	0	0	1	0	0	0	0
1	72	0	3	3	0	0		0	0	0	0	0
2	24	1	4	1	0	0	0	1	0	0	1	1
2	37	1	3	2	0	0	0	1	0	0	1	1
1	33	1	3	3	0	0	0	0	0	0	1	0
1	34	0	3	5	0	0		1	0	0	1	1
1	42	1	1	4	0	0	0	0	0	0	1	1
2	14	0	3	5	0	0		1	0	0	1	1
1	33	1	1	3	0	0	0	1	0	0	1	0
1	21	0	3	2	0	0		0	1	0	1	1
2	52	1	3	3	0	0	0	0	1	0	1	1
2	74	0	4	2	0	0		1	0	0	1	1
2	19	1	2	3	0	0	0	0	0	0	1	1
2	16	0	1	4	0	0		1	1	0	1	1
2	64	1	1	2	0	0	0	1	0	0	1	1
1	15	0	1	2	0	0		1	0	0	1	1
2	14	0	5	2	0	0		1	1	0	1	1
1	67	1	1	4	0	0	0	1	0	0	1	1
2	36	1	3	3	0	0	0	0	0	0	1	1
2	47	0	3	1	0	0		1	1	0	1	1
2	27	1	1	3	0	0	0	0	1	0	1	1
1	17	0	1	5	0	0		1	0	0	1	1
2	80	0	1	3	0	0		1	0	0	1	1
2	14	0	1	2	0	0		1	1	0	1	1
2	71	0	1	4	0	0		1	0	0	1	1
1	14	0	1	3	0	0		1	0	0	1	1
2	14	0	3	2	0	0		1	0	0	1	1
2	17	0	1	1	0	0		1	0	0	1	0
2	51	1	3	2	0	0	0	0	1	0	1	1
2	53	1	1	3	0	0	0	1	0	0	1	1
1	34	1	3	2	0	0	0	1	0	0	1	1
1	16	0	1	4	0	0		0	1	0	1	1
1	21	1	1	3	0	0	0	0	0	0	1	1
1	35	1	3	3	0	0	0	1	0	0	1	1
2	58	1	3	3	0	0	0	0	0	0	1	0
2	27	1	2	2	0	0	0	1	0	0	1	1
1	40	1	2	3	0	0	0	1	0	1	1	0
2	14	0	1	2	0	0		1	1	0	1	1
1	14	0	3	4	0	0		1	0	0	1	0
2	47	1	1	4	0	0	0	1	0	0	1	1
1	21	0	1	4	1	0		1	1	1	1	1
2	53	0	2	2	0	0		1	0	0	1	1
2	49	0	1	3	0	0		1	0	0	1	1
2	37	0	3	4	0	0		1	0	0	1	1
2	15	0	1	4	0	0		1	0	0	1	1
1	17	0	5	2	0	0		0	0	0	1	1
1	29	0	1	3	0	0		1	0	0	1	1
2	34	1	3	3	0	0	1	1	0	0	0	0
1	15	0	2	3	0	0		1	0	0	1	1
2	82	1	1	2	0	0	0	0	0	0	1	1
2	42	1	3	1	0	0	0	1	1	0	1	1
2	54	0	1	4	0	0		1	1	0	1	1
2	18	1	3	2	0	0	0	0	0	0	1	0
1	29	0	3	2	0	0		1	1	0	0	0
2	14	0	2	5	0	0		0	1	0	1	0
2	70	1	1	3	0	0	0	1	0	0	1	1
1	27	0	3	1	0	0		1	0	0	1	1
2	22	1	3	1	0	0	0	1	1	0	1	0
1	23	0	3	3	0	0		1	0	0	1	0
1	53	1	4	3	0	0	0	1	0	0	1	1
1	15	0	3	3	0	0		1	0	0	1	1
1	38	1	3	2	0	0	0	1	0	0	1	0
2	17	0	3	2	0	0		1	1	0	1	1
1	15	0	2	4	0	0		1	0	0	1	0
2	76	1	1	4	0	0	0	0	1	0	1	1
2	39	1	1	4	0	0	0	1	0	0	1	1
2	15	0	2	2	0	0		1	0	0	0	0
1	57	1	3	2	0	0	0	1	0	0	1	1
2	50	1	5	5	0	0	0	1	0	0	1	1
1	16	0	1	3	1	0		1	0	0	1	1
2	28	1	5	2	0	0	0	1	0	0	1	1
1	43	0	1	3	0	0		1	0	0	1	1
1	25	0	3	3	0	0		0	0	0	1	0
1	49	1	3	3	0	0	0	1	0	0	1	1
1	33	0	2	3	1	0		1	0	0	1	1
2	65	1	1	4	0	0	0	1	0	0	1	1
2	51	1	3	2	0	0	0	1	0	0	1	1
2	65	0	3	3	0	0		1	0	0	1	1
1	34	1	3	3	0	0	0	1	0	0	1	1
1	70	1	1	4	0	0	0	1	0	0	1	1
2	55	1	1	4	0	0	0	1	0	0	1	1
1	60	1	1	3	0	0	0	1	0	0	1	1
2	22	1	3	5	0	0	0	0	1	0	0	0
1	16	0	2	4	0	0		0	0	0	0	0
2	16	0	3	3	0	0		0	0	0	1	0
1	36	0	2	2	0	0		0	0	0	1	0
2	25	1	3	3	0	0	0	1	0	0	1	1
1	14	0	3	2	0	0		1	1	0	0	0
1	29	1	3	2	0	0	1	1	0	0	1	0
1	15	0	3	5	0	0		0	0	0	1	1
2	60	0	3	3	0	0		1	0	0	1	1
2	15	0	3	4	0	0		1	0	1	1	1
2	82	0	1	4	0	0		1	0	0	1	1
2	40	1	1	3	0	0	0	1	0	0	1	1
2	18	0	3	3	0	0		1	1	0	1	1
2	16	0	3	3	0	0		1	0	0	0	0
1	47	0	1	4	0	0		1	0	0	1	1
2	28	1	3	3	0	0	0	1	1	0	1	1
1	39	1	3	4	0	0	0	1	1	0	1	1
2	32	1	3	2	0	0	0	0	0	0	1	1
2	53	0	3	3	0	0		0	1	0	1	1
2	36	1	1	2	0	0	0	1	0	0	1	1
1	23	1	3	3	0	0	0	1	0	0	0	0
2	59	1	3	3	0	0	0	1	1	0	1	1
2	41	0	1	1	0	0		1	0	0	1	1
2	17	1	3	5	0	0	1	0	0	0	1	1
1	49	1	3	2	0	0	0	1	0	0	1	1
1	38	1	3	5	0	0	0	1	0	0	1	0
1	15	0	1	4	0	0		1	0	0	1	1
1	16	0	3	3	0	0		0	0	0	1	1
2	23	1	3	3	0	0	0	1	0	0	1	1
2	14	0	3	1	0	0		1	0	0	1	1
1	16	0	3	3	0	0		1	0	0	1	1
2	32	1	1	3	0	0	0	0	0	0	1	1
2	56	1	1	2	0	0	0	1	0	0	1	1
2	20	1	3	2	0	0	0	0	1	0	1	1
1	24	1	2	3	0	0	0	0	1	0	1	0
1	14	0	3	2	0	0		1	0	0	1	1
2	47	0	1	2	0	0		1	0	0	1	1
1	66	1	1	3	0	0	0	1	0	0	1	0
2	14	0	3	3	1	0		1	0	0	1	0
1	36	1	3	4	0	0	0	0	1	0	1	1
2	36	1	1	3	0	0	0	1		0	1	1
1	58	0	1	3	0	0		0	0	0	1	1
1	15	0	3	3	0	0		0	0	0	0	0
2	45	1	2	3	0	0	0	1	0	0	1	1
2	63	1	1	4	0	0	0	0	1	0	1	1
2	25	1	1	5	0	0	0	1	0	0	1	1
1	40	1	3	3	0	0	0	1	0	0	1	1
2	21	1	1	3	0	0	0	1	0	0	1	0
2	35	1	1	3	0	0	0	1	0	0	1	0
1	38	1	3	3	0	0	0	1	0	0	1	1
2	41	1	1	4	0	0	0	0	1	0	1	0
2	14	0	1	3	0	0		1	0	0	1	0
2	70	0	3	2	0	0		1	0	0	1	1
1	36	1	3	3	1	0	0	0	1	0	1	1
1	15	0	1	2	0	0		1	0	0	1	1
1	15	0	1	5	0	0		1	1	0	1	1
1	75	1	1	4	0	0	0	0	1	0	1	1
2	15	0	1	4	0	0		1	0	0	1	1
2	17	1	3	3	0	0	0	1	0	0	1	1
2	43	0	3	1	0	0		1	1	0	1	1
1	30	1	3	2	0	0	0	1	0	0	1	1
1	19	0	1	3	0	0		1	0	0	1	1
2	82	0	1	4	0	0		0	1	0	1	1
1	16	0	3	3	0	0		1	0	0	1	0
2	28	1	1	2	0	0	0	1	0	0	1	1
2	66	1	1	2	0	0	0	1	0	0	1	1
2	22	1	3	2	0	0	0	1	0	0	0	0
2	15	0	3	3	0	0		1	0	0	1	1
2	44	1	1	4	0	0	0	1	0	0	1	1
1	62	1	1	3	0	0	0	1	0	0	1	1
1	14	0	1	3	0	0		1	0	0	1	1
1	19	0	2	3	0	0		1	0	0	1	0
2	50	0	2	2	0	0		0	0	0	1	1
2	34	0	3	3	0	0		1	1	0	1	1
1	15	0	1	5	0	0		1	0	0	1	1
1	66	0	1	3	0	0		1	0	0	0	0
2	51	0	1	1	0	0		1	0	0	1	1
2	15	0	3	1	0	0		0	0	0	1	1
2	66	0	1	3	0	0		0	0	0	1	1
1	26	1	3	5	0	0	1	1	0	0	1	1
2	14	0	3	3	0	0		1	1	0	1	1
2	23	0	1	3	0	0		0	1	0	1	0
1	29	1	2	3	0	0	0	0	1	0	1	0
1	50	1	2	4	0	0	0	1	1	0	1	1
1	52	1	1	3	0	0	0	1	0	0	1	1
1	33	0	3	3	0	0		1	0	0	1	0
1	31	1	1	5	0	0	0	1	0	0	1	1
2	45	0	2	3	0	0		0	0	0	1	1
2	74	0	1	4	0	0		0	0	0	1	1
2	31	1	1	3	0	0	0	1	0	0	1	1
2	30	0	3	3	0	0		0	1	0	1	0
2	36	1	4	2	0	0	0	1	0	0	1	1
2	59	0	1	3	0	0		0	1	0	1	1
1	28	0	3	3	0	0		1	0	0	1	0
2	18	0	3	2	0	0		1	0	0	1	1
1	36	1	3	5	0	0	0	1	0	0	1	1
2	52	1	1	3	0	0	0	1	0	0	1	1
2	51	1	3	2	0	0	0	1	0	0	1	1
2	29	1	2	2	0	0	0	1	0	0	1	1
2	23	0	1	3	0	0		0	0	0	1	1
1	26	0	3	3	0	0		0	0	0	1	1
2	66	0	3	3	0	0		0	1	0	1	1
2	50	1	3	2	0	0	0	1	0	0	1	1
1	16	0	1	4	0	0		0	0	0	1	1
2	28	1	3	3	0	0	0	1	0	0	1	1
1	34	1	1	3	0	0	0	1	0	0	1	1
2	46	1	3	3	0	0	0	1	0	0	1	1
1	34	0	1	2	0	0		1	0	0	1	1
2	43	0	3	1	0	0		0	1	0	1	1
1	44	1	1	2	0	0	0	0	0	0	1	1
2	38	1	1	4	0	0	0	1	1	0	1	0
2	31	1	3	2	0	0	0	0	1	0	0	0
2	73	0	1	3	0	0		0	1	0	1	1
2	15	0	3	3	0	0		0	1	0	1	1
2	52	1	1	4	0	0	0	1	0	0	1	1
2	14	0	3	3	0	0		1	1	0	1	1
2	29	1	3	5	0	0	0	1	1	0	1	1
2	59	0	1	3	0	0		0	1	0	1	1
2	42	1	3	2	0	0	0	1	1	0	1	1
2	16	0	1	5	0	0		1	0	0	1	1
1	30	0	3	2	0	0		1	0	0	1	1
2	40	1	1	3	0	0	0	1	0	0	1	1
2	32	1	1	3	0	0	0	1	1	0	1	1
1	28	1	2	3	0	0	0	0	0	0	1	1
1	48	1	1	5	0	0	0	1	0	0	1	1
1	16	0	3	3	0	0		1	0	0	1	1
1	48	1	3	3	0	0	0	1	0	0	1	0
1	46	1	1	3	0	0	0	1	0	0	1	0
1	43	1	2	3	0	0	0	1	0	0	1	1
1	41	1	3	3	0	0	0	1	0	0	0	0
2	62	0	3	4	0	0		0	1	0	1	1
1	21	0	3	2	0	0		1	0	0	1	1
2	20	1	3	3	0	0	0	1	0	0	1	1
1	54	1	1	3	0	0	0	0	0	0	1	0
1	15	0	3	2	0	0		0		0	1	1
2	50	0	1	2	0	0		0	1	0	1	1
2	16	0	3	3	0	0		1	0	0	0	0
1	14	0	1	3	0	0		1	0	0	1	1
2	18	0	1	1	0	0		1	0	0	1	1
2	31	1	2	3	0	0	0	1	0	0	1	0
2	17	0	1	4	0	0		0	1	0	1	1
1	14	0	2	3	0	0		1	0	0	1	1
1	34	1	3	2	0	0	0	1	0	0	1	1
1	15	0	2	2	0	0		1		0	1	1
1	28	1	1	3	0	0	0	1	1	0	1	0
1	14	0	2	3	0	0		1	0	0	1	1
1	16	0	3	2	0	0		0	0	0	1	1
2	84	0	1	4	0	0		1	0	0	1	1
1	31	1	3	3	0	0	0	0		1	1	1
2	56	0	3	3	0	0		1	0	0	1	1
2	79	0	2	2	0	0		1	0	0	1	1
2	17	0	3	2	0	0		0	0	0	1	1
2	16	0	4	2	0	0		1	0	0	1	1
1	56	0	1	4	0	0		1	1	0	1	1
2	15	0	3	3	0	0		0	0	0	1	1
1	56	1	3	3	0	0	1	0	1	0	1	1
2	24	1	3	2	0	0	0	1	0	0	1	1
1	74	1	1	4	0	0	0	1	0	0	1	0
1	26	0	1	3	0	0		1	0	0	1	0
2	61	0	1	2	0	0		1	0	0	1	1
2	32	0	3	2	0	0		1	0	0	1	1
2	58	1	1	3	0	0	0	1	0	0	1	1
2	28	0	3	3	0	0		0	1	0	1	0
2	50	0	3	3	0	0		1	0	0	1	1
2	54	0	3	3	0	0		1	0	0	1	1
2	17	0	3	2	0	0		1	0	0	0	0
1	53	1	3	3	0	0	0	1	1	0	0	0
1	14	0	3	3	0	0		1	0	0	1	1
1	21	0	3	3	0	0		1	0	1	1	0
1	27	1	1	3	0	0	0	1	0	0	1	0
2	36	1	3	2	0	0	1	1	0	0	1	1
2	50	1	1	2	0	0	0	1	0	0	1	1
2	53	1	1	4	0	0	0	1	0	0	1	1
1	16	0	3	5	0	0		1	0	0	1	1
1	72	0	3	2	0	0		0	0	0	1	1
1	67	0	2	1	0	0		1	1	0	0	0
2	15	0	2	3	0	0		0	1	0	1	1
1	39	1	5	3	0	0	1	0	0	0	1	1
2	73	0	1	4	0	0		1	0	0	1	1
2	72	0	3	2	0	0		1	0	0	1	1
1	14	0	1	3	0	0		1	0	0	0	0
1	63	1	1	3	0	0	0	1	0	0	1	1
1	21	0	3	3	0	0		1	0	0	1	1
2	48	0	3	5	0	0		0	1	0	1	1
1	41	1	1	3	0	0	0	0	0	0	1	1
2	16	0	1	3	0	0		1	0	0	1	1
1	24	0	2	3	0	0		1	0	0	1	0
2	65	1	3	2	0	0	0	0	1	0	1	1
1	28	0	4	1	0	0		0	0	1	1	0
1	53	0	2	2	0	0		1	0	0	0	0
1	36	1	1	2	0	0	0	1	1	0	1	1
1	56	1	1	3	0	0	0	1	0	0	1	1
1	40	1	1	2	0	0	0	0	0	0	1	1
2	44	0	1	3	1	0		0	1	0	1	1
1	14	0	1	4	0	0		1	0	0	1	1
2	40	1	2	3	0	0	0	0	0	0	1	1
2	79	0	2	3	0	0		0	1	0	1	1
2	15	0	1	3	0	0		1	0	0	1	1
1	14	0	3	3	0	0		0	1	0	1	0
1	27	0	1	2	0	0		0	1	0	1	1
2	54	0	1	2	0	0		1	0	0	1	1
2	64	0	3	3	0	0		0	0	0	1	1
2	62	1	3	2	0	0	0	1	0	0	1	1
2	14	0	3	2	0	0		1	1	0	1	0
1	34	0	3	3	0	0		1	0	0	1	1
2	59	0	3	3	0	0		0	0	0	1	1
2	43	1	3	2	0	0	0	1	1	0	1	1
1	37	1	2	2	0	0	0	1	0	0	1	1
1	17	0	3	1	0	0		0	1	0	0	0
2	30	0	1	2	0	0		1	0	0	1	0
1	26	0	2	3	0	0		1	0	1	1	1
2	17	0	2	1	0	0		1	0	0	1	1
2	58	0	2	2	0	0		1	0	0	1	1
2	39	0	1	3	0	1		1	0	0	1	1
1	14	0	3	3	1	0		1	0	0	1	1
2	70	0	1	5	0	0		1	0	0	1	1
2	31	0	3	3	0	0		1	1	0	1	1
2	43	1	3	3	0	0	0	1	0	0	1	1
1	28	1	3	3	0	0	0	1	0	0	1	1
1	56	0	1	3	0	0		1	0	0	1	1
2	27	1	3	2	0	0	0	1	0	0	1	1
1	14	0	3	3	0	0		1	0	0	1	1
1	15	0	3	2	1	0		1	1	1	1	1
2	65	0	3	5	0	0		0	1	0	1	1
1	25	0	1	2	0	0		1	0	0	1	0
1	29	1	1	4	0	0	0	1	0	0	1	1
2	49	1	1	4	0	0	0	1	0	0	1	1
2	25	1	3	3	0	0	0	0	0	0	1	1
1	15	0	3	5	0	0		1	1	0	1	1
1	41	1	1	3	0	0	0	0	1	0	1	1
1	48	0	3	2	0	0		0	1	0	1	1
1	62	0	2	3	0	0		0	0	0	1	1
1	14	0	1	1	0	0		0	0	0	1	1
2	53	0	3	3	0	0		1	0	0	1	1
2	27	1	1	3	0	0	0	1	0	0	1	0
2	14	0	4	2	0	0		1	0	0	1	1
2	17	1	1	5	0	0	0	1	0	0	1	1
2	16	0	3	3	0	0		1	0	0	1	1
1	49	1	3	2	0	0	0	1	0	0	1	1
1	31	0	1	3	0	0		0	0	0	1	1
2	55	1	1	4	0	0	0	1	0	0	1	1
1	30	0	3	2	0	0		0	0	0	1	1
2	15	0	3	3	0	0		1	0	0	1	1
1	15	0	2	3	0	0		0	0	1	1	1
2	14	0	3	3	0	0		0	0	0	1	1
2	50	1	3	1	0	0	0	1		0	1	1
2	17	0	3	3	0	0		1	0	0	1	1
2	15	0	1	2	0	0		1	1	0	1	1
2	35	1	3	3	0		0	1	1	0	1	1
2	70	0	1	4	0	0		0	1	0	1	1
1	48	1	1	4	0	0	0	1	0	0	1	1
1	45	1	1	3	0	0	0	1	0	0	1	1
2	46	0	2	1	0	0		1	0	0	1	1
2	50	0	3	3	0	0		1	0	0	1	1
2	15	0	2	4	0	0		1	0	0	1	1
1	50	1	1	4	0	0	0	1	0	0	1	0
1	26	1	1	3	0	0	0	1	0	0	1	1
2	35	1	2	3	0	0	0	1	0	0	1	1
1	15	0	3	3	0	0		1	0	0	1	1
2	28	1	2	3	0	0	1	0	1	0	1	1
1	69	0	3	1	0	0		1	0	0	1	1
1	27	1	3	1	0	0	0	0		0	1	0
2	31	1	3	2	0	0	1	1	0	1	0	0
1	21	0	3	1	0	0		1	0	0	1	1
2	14	0	2	2	0	0		1	0	0	1	1
1	59	1	1	3	0	0	0	1	0	0	1	1
1	29	1	2	3	0	0	0	1	0	0	1	1
1	43	1	3	2	0	0	0	1	0	0	1	1
2	17	0	2	2	0	0		1	0	0	1	0
1	42	1	3	3	0	0	0	0	0	1	1	1
2	49	1	1	3	0	0	0	0	1	0	1	1
2	42	1	2	2	1	0	1	1	1	0	1	1
2	29	1	3	3	0	0	0	1	0	0	1	0
2	41	0	3	3	0	0		0		0	1	0
2	41	0	2	3	0	0		1	0	0	1	0
1	42	1	1	4	0	0	0	1	0	0	1	1
2	20	0	3	3	0	0		1	0	0	1	1
1	27	0	3	3	0	0		1	1	0	1	1
2	16	0	1	3	0	0		1	0	0	1	1
1	75	0	1	3	0	0		0	0	0	1	1
2	35	0	1	4	0	0		1	0	0	1	1
2	83	0	1	4	0	0		1	1	0	1	1
1	27	0	3	2	1	1		1	1	0	1	1
2	57	1	1	4	0	0	0	0	1	0	1	1
2	22	1	4	3	0	0	0	1	0	0	1	1
1	64	1	2	5	0	0	0	1	0	0	1	1
1	39	1	2	3	0	0	0	1	0	0	1	1
2	64	1	1	3	0	0	0	1	0	0	1	1
1	69	1	3	2	0	0	0	1	0	0	1	1
2	38	0	1	3	0	0		0	1	0	0	0
2	50	0	3	1	0	0		1	0	0	1	1
2	14	0	1	5	0	0		0	1	0	1	1
1	30	1	2	3	0	0	0	1	0	0	1	1
2	58	0	2	3	0	0		0	1	0	1	0
1	16	0	1	3	0	0		1	0	0	1	0
2	60	0	5	4	0	0		1	0	0	1	1
2	59	1	2	3	0	0	0	0	1	0	1	1
2	17	0	1	4	0	0		0	1	0	0	0
1	19	0	3	1	0	0		1	0	0	1	0
2	15	0	3	3	0	0		1	0	0	1	1
2	34	0	3	2	0	0		1	0	0	1	1
2	24	1	1	2	0	0	0	1	0	0	1	1
2	36	1	3	3	0	0	0	1	0	0	1	1
2	75	0	1	3	0	0		1	1	0	1	1
2	54	1	1	4	0	0	0	1	1	0	0	0
1	32	0	3	3	0	0		1	0	0	1	1
1	15	0	1	2	0	0		1	0	0	1	1
1	42	1	3	3	0	0	0	1	0	0	1	1
2	67	1	3	3	0	0	0	0	1	0	1	0
2	16	0	1	4	0	0		1	0	0	1	0
1	18	0	1	3	0	0		1	0	1	0	0
1	17	0	3	3	0	0		1	0	1	1	0
2	14	0	3	2	0	0		1	0	0	1	1
2	14	0	2	3	0	0		1	1	0	0	0
2	17	0	4	3	0	0		1	1	0	1	1
2	39	1	4	3	0	0	1	1	0	0	1	1
2	34	0	1	4	0	0		0	0	0	1	1
2	18	0	1	5	0	0		1	0	0	1	1
2	36	1	1	4	0	0	0	1	1	0	1	1
1	49	1	1	3	0	0	0	1	0	0	1	1
2	38	1	1	4	0	0	1	1	1	1	0	0
1	33	1	3	3	0	0	0	1	0	0	1	1
1	17	0	1	2	0	0		1	0	0	1	0
2	16	0	1	3	0	0		1	0	0	1	1
1	81	0	1	4	0	0		0	0	0	1	1
2	44	0	3	3	0	0		0	0	0	1	1
1	14	0	1	2	0	0		0	0	0	0	0
2	42	0	3	5	0	0		0	0	0	0	0
2	14	0	3	2	0	0		1	0	0	1	1
2	41	1	3	3	0	0	0	1	1	0	1	1
2	14	0	1	5	0	0		1	0	0	1	1
1	25	1	3	3	0	0	1	0	0	1	0	0
1	14	0	1	4	0	0		0	0	0	1	1
2	14	0	3	3	0	0		1	0	0	1	1
2	74	0	3	3	0	0		1	1	0	1	1
2	36	1	3	2	0	0	0	1	0	0	1	1
2	23	1	3	3	0	0	0	1	0	0	1	1
2	14	0	3	2	0	0		1	0	0	1	0
2	16	0	1	1	0	0		0	1	0	1	1
2	15	0	3	2	0	0		1	1	0	1	1
2	59	0	1	1	0	0		1	1	0	1	1
2	17	0	1	3	0	0		1	0	0	1	0
1	30	1	1	3	0	0	0	1	0	0	1	1
2	23	1	3	2	0	0	0	1	0	0	1	0
1	30	0	1	3	0	0		0	0	0	1	1
2	25	1	3	3	0	0	0	1	0	0	0	0
2	26	1	3	2	0	0	0	1	0	0	1	1
2	51	1	2	2	0	0	0	1	0	0	1	1
2	81	0	3	2	0	0		1		0	1	1
2	28	1	3	2	0	0	0	0	1	0	1	0
2	38	0	1	3	0	0		0	1	0	1	1
2	15	0	1	3	0	0		1	1	0	1	0
2	63	0	1	2	0	0		1	1	0	0	0
1	15	0	1	3	0	0		1	0	0	0	0
2	64	0	3	3	0	0		0	1	0	1	1
1	48	1	3	1	0	0	0	0	0	0	1	0
2	49	1	3	2	0	0	0	1	0	0	1	1
1	39	1	3	1	0	0	0	1	0	0	1	1
2	25	0	3	3	0	0		0	0	0	1	1
2	15	0	3	3	0	0		1	0	0	1	1
2	28	1	3	3	0	0	0	1	0	0	1	0
1	67	0	1	4	0	0		0	0	0	1	1
2	33	1	3	3	0	0	0	1	0	0	1	1
1	17	0	3	2	0	0		1	0	0	0	0
1	14	0	1	5	0	0		0	0	0	1	1
2	70	1	3	4	0	0	0	1	0	0	1	1
1	49	1	1	3	0	0	0	1	0	0	1	0
1	37	1	1	3	0	0	1	0	0	0	0	0
1	20	0	1	3	0	0		1	0	0	1	1
2	37	1	3	2	0	0	0	0	0	1	0	0
1	60	1	1	4	0	0	0	1	0	0	1	0
1	22	0	1	3	0			1	0	0	0	0
2	16	0	1	3	0	0		1	0	0	1	0
1	21	0	3	3	0	0		1	0	0	1	0
2	46	0	3	2	0	0		0	1	0	1	1
2	23	1	4	3	0	0	0	0	0	0	0	0
2	28	1	1	4	0	0	0	1	0	0	1	1
1	37	0	2	3	0	0		0	0	0	1	1
1	17	0	3	3	0	0		1	1	0	0	0
2	26	0	4	1	0	0		1	0	0	1	1
1	32	0	1	3	1	0		1	0	0	0	0
1	19	0	2	3	0	0		1	0	0	1	1
2	46	1	1	3	0	0	0	0	0	0	1	1
2	38	0	3	3	0	0		1	1	0	1	1
2	20	1	3	3	0	0	0	1	0	0	1	1
1	14	0	3	2	0	0		1	0	0	1	1
2	15	0	1	4	0	0		1	0	0	1	1
1	42	0	1	2	0	0		0	0	1	1	1
2	39	0	1	3	0	0		0	0	1	1	1
1	38	0	1	3	1	0		0	0	0	1	0
2	16	0	1	3	0	0		1	0	0	1	0
1	16	0	1	2	1	1		0	1	0	0	0
1	31	1	3	2	0	0	0	1	0	0	1	1
1	43	1	1	3	0	0	0	0	0	0	1	0
1	70	1	2	3	0	0	0	1	0	0	1	1
1	51	1	1	3	0	0	0	1	0	0	0	0
2	68	0	3	2	0	0		1	0	0	1	1
2	14	0	3	2	0	0		1	0	0	1	1
2	52	0	1	3	0	0		1	0	0	1	1
2	45	1	1	3	0	0	0	1	0	0	1	1
2	62	1	1	3	0	0	0	1	0	0	1	0
1	16	0	1	3	0	0		1	0	0	0	0
1	50	1	3	4	0	0	0	0	1	0	1	1
2	25	1	2	2	0	0	1	1	0	0	1	1
1	74	0	3	3	0	0		1	0	0	1	0
1	75	0	3	2	0	0		0	1	0	1	1
2	68	0	3	2	0	0		1	1	0	1	1
1	31	1	1	3	0	0	0	1	1	0	1	1
2	19	0	3	3	0	0		1	0	0	1	1
2	58	0	1	4	0	0		1	0	0	1	1
2	28	0	3	3	0	0		1	0	0	1	0
1	35	1	2	3	0	0	0	0	0	1	0	0
1	59	1	3	2	0	0	0	1	0	1	1	1
1	33	1	3	2	0	0	0	1	0	0	1	1
2	61	0	4	2	0	0		0		0	1	1
1	31	1	3	3	0	0	0	1	0	0	0	0
2	17	1	1	1	0	0	0	1	0	0	1	1
1	43	0	3	2	0	0		1	0	0	1	0
2	15	0	3	3	0	0		1	0	0	1	1
2	65	0	3	3	0	0		1	0	0	1	1
2	47	1	1	4	0	0	0	0	0	0	1	0
1	27	0	3	2	0	0		0	0	0	1	1
1	32	1	1	3	0	0	0	1	0	0	1	1
2	16	0	1	3	0	0		1	0	0	1	0
2	54	0	3	2	0	0		0	1	0	1	1
1	16	0	3	3	0	0		1	0	0	1	0
1	53	0	2	3	0	0		1	0	0	0	0
1	16	0	2	3	0	0		0	0	0	1	1
1	25	1	1	4	0	0	0	1	0	0	1	1
1	19	0	3	2	0	0		1	0	0	1	0
2	25	0	1	3	0	0		0	0	0	1	1
2	55	0	3	3	0	0		1	0	0	1	1
2	34	0	3	2	0	0		1	0	0	1	1
1	14	0	3	3	0	0		1	0	0	1	1
1	51	1	2	2	0	0	0	0	1	0	1	1
2	57	1	1	3	0	0	0	0	1	0	1	1
2	83	0	1	3	0	0		1	0	0	1	1
2	15	0	3	2	0	0		1	1	0	1	1
1	71	1	1	4	0	0	0	0	1	0	1	1
1	76	0	1	3	0	0		1	0	0	1	1
2	16	0	1	1	0	0		1	0	0	1	1
2	15	0	1	3	0	0		1	0	0	1	1
2	30	1	3	3	0	0	1	0	1	0	1	1
2	18	1	4	2	0	0	0	1	0	0	1	1
2	27	0	3	3	0	0		1	1	0	1	0
1	80	1	1	3	0	0	0	1	0	0	1	1
2	36	1	3	3	0	0	0	0	0	0	1	0
2	48	1	3	3	0	0	0	1	0	0	1	1
1	15	0	3	2	0	0		1	0	0	1	0
2	14	0	1	3	0	0		1	0	0	1	1
1	15	0	2	3	1	0		1	0	0	1	1
2	23	1	1	3	0	0	1	0	1	0	1	1
2	47	1	1	3	0	0	0	1	1	0	1	1
2	50	1	2	3	0	0	0	1	0	0	1	1
2	42	1	3	2	0	0	0	0	1	0	1	1
2	16	0	3	3	0	0		1	0	0	1	1
2	17	0	1	3	0	0		0	0	0	1	1
1	39	1	3	3	0	0	0	0	0	0	1	1
2	17	0	3	2	0	0		1	0	0	1	1
2	51	1	1	3	0	0	0	1	0	0	1	1
2	46	1	3	3	0	0	0	1	1	0	1	1
2	23	0	3	2	0	0		0	0	0	1	1
2	56	1	3	2	0	0	0	1	1	0	1	1
2	16	1	3	3	0	0	0	1	0	0	1	1
2	57	1	1	2	0	0	0	1	1	0	1	1
2	29	0	5	2	0	0		0	1	0	1	1
2	14	0	5	3	0	0		1	0	0	1	1
2	22	0	3	1	0	0		1	0	0	1	1
2	38	1	1	4	0	0	0	0	0	0	1	1
1	81	1	4	3	0	0	0	1	0	0	0	0
2	37	0	2	3	0	0		0	0	0	1	1
2	37	1	2	2	0	0	0	0	0	0	1	1
2	17	0	3	3	0	0		1	0	0	0	0
2	58	1	3	2	0	0	0	1		0	1	1
2	83	1	1	3	0	0	0	1	0	0	1	1
2	19	0	1	3	0	0		1	0	0	1	0
2	29	1	1	3	0	0	0	0	0	0	1	1
1	52	1	2	3	0	0	0	1	0	1	1	1
1	15	0	3	3	0	0		1	0	0	0	0
2	60	1	1	3	1	0	0	0	1	0	1	1
1	85	1	1	2	0	0	0	1	0	0	1	1
1	76	1	3	3	0	0	0	1	0	0	1	0
1	28	0	3	3	1	0		1	1	0	1	0
1	53	1	1	3	0	0	0	0	0	0	1	0
1	28	1	3	3	0	0	0	1	0	0	1	1
2	45	1	1	3	0	0	0	1	0	0	1	1
2	17	0	1	2	0	0		0	0	0	1	0
1	40	1	3	1	0	0	0	1	1	1	1	0
1	30	1	3	3	0	0	0	0	0	0	1	1
2	32	0	2	3	0	0		1	0	0	0	0
1	74	0	2	5	0	0		0	1	0	1	1
1	14	0	3	3	1	0		1	0	0	1	0
2	18	0	3	1	0	0		1	0	0	1	1
2	16	0	1	4	0	0		1	0	0	1	1
1	14	0	2	3	0	0		1	0	0	1	1
1	14	0	2	5	0	0		1	0	0	1	1
1	66	1	1	3	0	0	0	1	0	0	1	1
1	14	0	2	2	0	0		0	0	0	1	0
1	16	0	1	4	0	0		0	1	0	1	1
1	37	1	1	2	0	0	0	1	0	0	1	1
2	75	0	5	3	0	0		1	0	0	1	1
2	19	0	1	2	0	0		1	0	0	1	1
2	24	1	3	2	0	0	0	1	0	0	1	1
2	52	1	3	3	0	0	0	0	0	0	1	1
2	16	0	1	1	0	0		1	1	0	1	1
2	17	0	2	1	0	0		0	1	0	1	1
2	46	1	3	2	0	0	0	1	0	0	1	1
2	14	0	3	3	0	0		1	1	0	1	1
2	56	1	5	3	0	0	0	1	0	0	1	1
1	63	0	1	4	0	0		1	1	0	1	1
2	33	1	1	2	0	0	1	1	0	0	1	1
2	54	1	3	5	0	0	0	1	0	0	1	1
1	37	1	1	4	0	0	0	0	1	0	1	1
2	35	0	3	2	0	0		0	1	0	1	1
2	32	1	3	3	0	0	0	1	1	0	1	1
1	26	1	3	3	0	0	0	0	0	0	1	1
2	61	0	1	4	0	0		0	1	0	1	1
2	67	1	1	3	0	0	0	1	0	0	1	1
1	16	0	3	3	1	0		1	0	0	1	0
1	35	0	1	2	0	0		0	0	0	1	1
2	27	1	3	4	0	0	0	1	0	0	1	1
1	14	0	2	2	1	0		0	0	0	1	1
2	52	1	3	3	0	0	0	0	0	0	1	1
2	16	0	3	2	0	0		1	0	0	1	1
1	50	1	1	2	0	0	0	1	1	0	1	1
1	23	1	1	3	0	0	0	1	0	0	0	0
2	73	0	3	2	0	0		0	1	0	1	1
1	16	0	3	3	0	0		1	0	0	1	1
1	53	0	2	2	0	0		0	0	0	1	0
1	33	1	2	2	0	0	0	1	0	0	1	1
2	73	1	1	4	0	0	0	0	0	0	1	1
1	39	1	3	3	0	0	0	0		0	1	1
2	16	0	3	1	0	0		1	0	0	1	1
2	15	0	3	2	0	0		1	0	0	1	1
2	37	1	3	2	0	0	0	1	0	0	1	1
2	50	0	5	3	0	0		0	0	0	1	0
2	44	0	3	5	0	0		0	1	0	1	1
2	43	1	1	3	0	0	0	0	1	0	1	1
2	15	0	1	2	0	0		1	0	0	1	1
2	35	1	1	4	0	0	0	1	0	0	1	0
1	15	0	3	3	0	0		0	0	0	0	0
2	29	0	3	2	0	0		1	0	0	1	1
2	14	0	4	1	0	0		1	0	0	1	1
2	16	0	3	1	0	0		1	0	0	0	0
2	27	1	3	2	0	0	0	1	0	0	1	1
2	17	0	3	5	0	0		1	1	0	1	1
2	42	1	2	3	0	0	0	1	0	0	1	1
1	36	1	1	4	0	0	0	1	0	0	1	1
2	17	0	3	1	0	0		1	0	0	1	1
2	35	0	1	3	0	0		1	0	0	1	1
2	15	0	3	3	0	0		1	0	0	0	0
2	58	0	1	2	0	0		1	0	0	1	1
1	32	1	3	3	0	0	0	1	0	0	1	0
2	20	1	1	3	0	0	0	0	0	0	1	0
2	45	1	3	3	0	0	0	1	0	0	1	1
2	60	0	2	2	0	0		1	0	0	1	1
2	64	1	3	1	0	0	0	0	1	0	1	1
2	62	1	3	2	0	0	0	0	0	0	1	0
2	24	0	3	3	0	0		0	0	0	1	0
1	80	1	2	3	0	0	0	1	0	0	1	1
2	31	0	1	3	0	0		0	1	0	1	1
1	52	1	3	1	0	0	0	1	0	0	1	0
2	60	1	2	3	0	0	0	0	0	0	1	1
2	51	0	3	4	1	0		1	0	0	1	1
1	43	1	3	3	0	0	0	1	0	0	1	1
2	82	0	3	2	0	0		0	1	0	1	1
1	16	0	3	3	0	0		1	0	0	0	0
1	81	1	1	3	0	0	0	1	0	0	1	1
1	24	0	3	1	0	0		1	0	0	1	1
1	16	0	3	3	0	0		1	0	0	1	1
2	16	0	3	5	0	0		1	1	0	1	1
2	16	0	1	4	0	0		1	0	0	1	1
2	37	1	2	3	0	0	0	1	0	0	1	1
1	14	0	2	2	0	0		1	0	0	1	0
1	38	1	3	1	0	0	0	1	1	0	1	1
2	64	1	1	3	0	0	0	1	0	0	1	1
1	17	0	3	3	0	0		1	0	0	1	1
1	17	0	3	3	0	0		0	1	0	1	1
1	66	1	3	2	0	0	0	0		0	1	1
1	18	1	3	4	0	0	0	1	0	0	1	0
1	14	0	1	3	1	0		1	0	0	1	1
1	16	0	1	3	0	0		1	0	0	1	1
1	33	1	1	2	0	0	0	1	0	0	1	1
1	30	0	1	3	0	0		1	0	0	1	1
1	25	0	1	4	0	0		1	0	0	1	0
2	24	1	1	1	0	0	0	1	0	0	1	1
2	52	0	1	3	0	0		1	1	0	1	0
1	65	1	2	3	0	0	0	1	0	0	1	1
1	17	0	3	3	0	0		1	0	0	1	1
2	70	0	1	3	0	0		1	0	0	1	1
2	16	0	1	1	0	0		1	0	0	1	1
2	23	0	3	3	0	0		1	1	0	0	0
1	17	0	2	5	0	0		0	0	0	1	1
2	25	1	1	3	0	0	0	1	0	0	1	1
1	15	0	3	3	0	0		1	0	0	1	0
1	68	1	2	4	0	0	0	0	0	0	1	0
2	18	0	3	3	0	0		1	1	0	1	1
2	15	0	3	3	0	0		0	1	0	1	1
2	27	1	1	3	0	0	0	0	1	1	1	1
2	14	0	1	4	0	0		1	0	0	1	1
1	14	0	5	2	0	0		1	0	0	1	1
2	16	0	2	3	1	1		1	0	0	0	0
2	22	0	1	2	0	0		1	1	0	1	1
1	45	1	3	1	0	0	0	1	0	0	0	0
2	67	0	3	3	0	0		0	1	0	1	1
2	59	1	3	3	0	0	0	0	1	0	0	0
1	77	0	3	2	0	0		1		0	1	1
2	20	1	3	3	0	0	0	0	0	0	1	1
2	26	1	3	5	0	0	1	1		0	1	1
2	38	1	1	3	0	0	1	0	0	0	1	1
1	17	0	1	2	0	0		1	0	0	1	1
1	42	0	3	2	0	0		1	0	0	1	0
2	42	1	3	5	0	0	1	1	1	1	1	1
1	15	0	3	3	0	0		1	0	0	1	1
1	15	0	3	2	0	0		0	1	0	1	1
2	14	0	3	3	0	0		1	0	0	1	1
1	29	1	3	3	0	0	0	0	0	0	1	0
2	24	1	1	4	0	0	0	1	0	0	1	0
1	74	1	1	4	0	0	0	0	0	0	1	0
1	16	0	1	2	0	0		1	0	0	1	1
2	79	0	1	1	0	0		1	0	0	1	1
2	41	1	1	4	0	0	0	0	1	0	0	0
2	35	1	1	3	0	0	0	1	0	0	1	1
1	21	1	1	3	0	0	1	0	1	0	0	0
2	18	1	3	5	0	0	0	0	0	0	1	0
2	44	1	2	3	0	0	0	0	0	1	1	1
2	34	1	3	3	0	0	0	1	0	0	1	1
2	42	0	1	3	0	0		1	0	0	1	1
1	25	0	3	3	0	0		1	0	0	1	1
2	17	0	3	2	0	0		1	1	0	1	1
2	34	1	3	5	0	0	0	1	0	0	1	1
2	17	0	1	2	0	0		1	0	0	1	1
1	22	1	3	1	0	1	0	1	0	1	1	1
1	17	0	1	4	0	0		0	0	0	1	0
2	22	1	1	4	0	0	0	1	0	0	1	0
1	54	0	2	3	0	0		0	0	0	1	1
2	34	0	3	3	0	0		1	0	0	0	0
1	40	0	1	3	0	0		1	0	0	1	1
2	54	1	3	2	0	0	0	1	0	0	1	1
2	28	1	1	3	0	0	0	0		0	1	1
2	17	0	1	3	0	0		1	0	0	1	0
1	72	0	1	3	0	0		1	1	0	1	1
1	30	1	3	3	0	0	0	1	0	0	1	1
2	44	1	3	2	0	0	1	1	0	0	1	1
1	60	0	3	3	0	0		1	0	0	1	1
1	17	0	3	1	0	0		1	0	0	1	1
2	51	0	1	3	0	0		0	1	0	1	1
2	45	1	3	2	0	0	0	1	0	0	1	1
1	35	1	3	5	0	0	1	0	1	0	1	1
2	32	1	1	3	0	0	0	1	0	0	1	1
1	15	0	1	3	0	0		1	0	0	1	0
1	62	1	3	3	0	0	0	1	0	0	1	1
2	54	1	3	2	0	0	0	1	0	0	1	1
2	26	1	3	3	0	0	0	1	0	0	1	0
2	36	0	3	3	0	0		1	0	0	1	1
1	26	0	3	5	0	1		1	0	0	1	1
2	24	0	3	3	0	0		1	0	0	1	1
2	30	1	1	2	0	0	0	1	0	0	1	1
2	60	0	5	2	0	0		1	1	0	1	1
2	68	0	3	3	0	0		1	0	0	1	1
1	39	1	3	3	0	0	0	0	0	0	0	0
2	44	1	1	3	0	0	0	1	0	0	1	0
2	56	0	3	2	0	0		1	1	0	1	1
2	33	0	3	2	0	0		1	0	0	1	0
2	21	0	1	2	0	0		0	0	0	1	1
2	63	1	1	5	0	0	0	1	0	0	1	1
2	82	1	1	4	0	0	0	1	1	0	1	1
1	32	1	2	3	0	0	0	1	0	0	1	1
2	30	1	3	3	0	0	0	0	0	0	1	1
2	84	0	3	5	0	0		1		0	1	1
2	56	0	1	3	0	0		0	1	0	1	1
1	67	1	1	3	0	0	0	1	0	0	1	1
2	54	1	5	2	0	0	0	1	0	0	1	1
1	17	0	1	3	0	0		1	0	0	1	1
2	33	0	1	3	0	0		0	0	1	1	0
1	22	0	3	2	0	0		1	0	0	1	1
1	35	1	1	3	0	0	0	1	0	0	1	1
1	27	0	1	3	0	0		0	0	0	1	0
2	24	1	2	3	0	0	0	1	0	0	1	0
2	67	1	3	2	0	0	0	0	0	0	1	1
1	25	0	3	3	0	0		1	0	0	1	0
2	52	1	3	3	0	0	0	1	0	0	1	1
2	66	0	1	3	0	0		1	0	0	1	1
2	16	0	3	3	0	0		0	0	0	0	0
1	15	0	3	2	0	0		1	0	0	1	1
1	52	0	1	3	0	0		1	0	0	1	1
2	82	0	3	2	0	0		0	1	0	1	1
2	62	0	1	2	0	0		1	0	0	1	1
1	74	1	1	3	0	0	0	0	0	0	1	0
1	50	1	3	1	0	0	0	1	0	0	1	1
1	39	1	3	2	0	0	0	1	0	0	0	0
1	17	0	3	3	0	0		0		0	1	1
1	17	0	3	3	0	0		1	0	0	0	0
2	69	1	3	3	0	0	0	1	0	0	1	1
1	48	0	1	3	0	0		0	0	0	1	0
2	14	1	1	4	0	0	0	0	1	0	1	0
2	50	1	1	3	0	0	0	0	1	0	1	1
2	37	1	3	1	0	0	1	0	1	0	1	1
2	45	1	1	3	0	0	0	1	0	0	1	1
2	49	1	1	5	0	0	1	1	0	0	1	1
2	57	1	1	4	0	0	0	0	0	0	1	1
2	33	1	3	2	0	0	0	1	0	0	1	1
2	47	1	2	3	0	0	0	1	0	0	1	1
1	14	0	3	2	0	0		1	0	0	1	1
2	51	1	2	1	0	0	1	1	1	0	0	0
1	49	0	1	3	0	0		0	0	0	1	1
1	16	0	1	3	0	0		1	0	0	1	1
2	43	0	1	5	0	0		0	1	0	1	1
1	17	0	3	2	0	0		1	0	0	1	1
2	54	1	1	2	0	0	0	1	0	0	1	1
1	64	1	1	1	0	0	0	0	1	0	0	0
2	43	1	3	1	0	0	1	1	1	0	1	0
2	47	0	1	4	0	0		1	0	0	1	0
2	41	1	2	3	0	0	0	1	0	0	1	1
2	76	0	3	2	0	0		1	1	0	1	1
2	17	0	3	1	0	0		1	1	0	1	1
2	17	0	3	3	0	0		1	0	0	1	1
1	68	0	3	3	0	0		1	0	0	0	0
1	39	0	1	5	0	0		1	1	0	1	1
2	22	1	4	2	0	0	0	1	1	0	1	1
2	27	0	2	2	0	0		0	0	0	1	1
2	64	0	1	3	0	0		1	0	0	1	0
2	26	1	3	2	0	0	1	1	0	0	1	1
1	40	1	3	5	0	0	0	1	0	0	1	1
1	15	0	3	1	0	0		1	1	0	1	1
2	14	0	1	5	0	0		1	0	0	1	1
2	17	0	1	3	0	0		1	0	0	0	0
2	16	0	3	2	0	0		1	0	0	1	1
2	63	0	3	2	0	0		1	1	0	1	1
2	37	1	1	3	0	0	0	1	0	0	1	1
2	17	0	1	5	0	0		1	1	0	1	1
1	63	1	3	3	0	0	0	1	0	0	1	1
2	36	1	3	2	0	0	0	0	0	0	1	1
2	14	0	1	3	0	0		1	0	0	1	1
1	17	0	2	3	0	0		1	0	0	1	1
1	48	0	1	3	0	0		1	0	0	1	1
2	41	1	3	3	0	0	0	1	0	0	1	1
2	72	0	1	4	0	0		0	0	0	1	1
2	31	1	3	1	0	0	0	1	0	0	1	1
2	14	0	3	3	0	0		1	0	0	1	1
2	27	1	1	3	0	0	0	1	0	0	1	1
1	59	1	3	2	0	0	0	1	0	0	1	1
2	17	0	3	3	0	0		0	0	0	1	1
1	38	0	3	2	0	0		0	0	0	1	0
1	81	0	1	4	0	0		1	1	0	1	1
2	29	1	1	3	0	0	0	0	0	1	1	1
2	21	0	1	3	0	0		1	0	0	1	1
2	67	1	1	4	0	0	0	1	1	0	1	1
2	43	0	1	4	0	0		0	1	0	1	1
1	66	0	99	3	0	0		0	0	0	1	1
2	18	0	1	3	0	0		0	0	1	0	0
2	15	0	3	3	0	0		1	0	0	1	1
2	50	0	2	5	0	0		1	0	0	1	1
1	60	1	1	4	0	0	0	0	1	0	1	1
2	55	1	3	5	0	0	0	1	1	0	1	1
2	50	0	3	3	0	0		0	1	0	1	1
2	14	0	3	3	0	0		1	0	0	1	1
2	28	1	3	3	0	0	0	1	0	0	1	1
2	41	1	3	1	0	0	0	1	0	0	1	0
2	50	1	3	2	0	0	0	0	1	0	1	1
2	70	0	3	3	0	0		1	0	0	1	1
2	70	1	3	2	0	0	0	1	0	0	1	1
2	45	0	3	2	0	0		1	0	0	1	1
2	14	0	2	2	0	0		1	0	0	1	1
2	27	1	1	2	0	1	0	1	1	0	1	1
1	14	0	3	3	0	0		1	0	0	1	1
2	43	1	3	2	0	0	0	1	0	0	1	1
2	14	0	3	3	0	0		1	1	0	0	0
2	20	1	3	2	0	0	0	0	0	0	1	1
1	31	0	1	3	0	0		0	0	0	1	0
2	51	0	1	4	0	0		1	0	0	1	1
2	40	1	1	4	0	0	0	0	1	0	1	1
2	15	0	3	2	0	0		1	0	0	1	1
1	22	1	3	5	0	0	0	1	0	0	1	1
2	40	1	1	4	0	0	1	0	1	0	1	0
1	28	1	1	2	0	0	1	1	0	0	1	1
2	60	0	1	3	0	0		1	0	0	1	1
2	91	0	1	2	0	0		1	1	0	1	1
2	20	0	3	5	0	0		1	0	0	1	1
2	51	1	1	3	0	0	0	0	0	0	0	0
1	15	0	3	5	0	0		0	1	0	1	1
1	14	0	1	3	0	0		1	0	0	0	0
2	57	1	3	3	0	0	0	1	1	0	0	0
2	17	0	3	5		0		1	1	0	1	1
2	15	0	3	4	0	0		1	0	0	1	1
1	17	0	3	5	0	0		0	0	0	1	0
2	14	0	3	3	0	0		1	1	0	1	1
1	18	1	3	2	0	0	0	1	0	1	1	1
2	52	0	1	3	0	0		1	0	0	1	0
2	34	0	1	5	0	0		1	1	1	1	0
1	15	0	1	3	0	0		1	0	0	1	1
1	41	1	1	3	0	0	0	1	1	0	1	1
2	20	1	3	2	0	0	0	1	0	0	1	1
2	15	0	3	5	0	0		1	0	0	1	1
2	32	1	1	3	0	0	0	0	1	0	1	1
2	30	1	2	2	0	0	1	1	1	0	1	1
2	21	1	3	1	0	0	0	1	0	0	1	0
2	64	1	1	5	0	0	0	0	0	0	1	1
1	63	1	1	5	0	0	0	0	0	0	1	1
2	44	1	3	3	0	0	0	0	1	0	0	0
2	32	1	3	4	0	0	0	1	0	0	1	1
2	15	0	3	2	0	0		1	0	0	1	1
2	45	0	3	3	0	0		0	1	0	1	1
1	47	1	3	4	0	0	0	1		0	1	1
1	52	0	3	2	0	0		0	0	0	1	0
2	66	0	5	1	0	0		0	1	0	1	0
2	23	1	2	3	0	0	0	1	0	0	1	1
2	17	0	3	3	0	0		0	0	0	1	0
1	44	1	2	3	0	0	0	1	0	0	1	1
1	27	1	1	3	0	0	0	1	0	0	1	1
1	57	0	2	5	0	0		1	0	0	1	1
2	29	1	2	2	0	0	0	1	1	0	1	1
1	16	0	1	4	0	0		1	0	0	1	0
2	31	1	3	2	0	0	0	1	0	0	1	1
2	35	1	1	3	0	0	0	1	0	0	1	1
2	14	0	3	2	0	0		1	0	0	1	1
2	75	0	1	3	0	0		1	0	0	1	1
2	23	1	3	5	0	0	0	1	0	0	1	0
2	57	1	1	4	0	0	0	0	1	0	1	1
1	15	0	3	2	0	0		1	0	0	0	0
2	15	0	3	5	0	0		1	1	0	1	1
1	17	0	3	2	0	0		1	0	0	1	1
1	14	0	3	3	0	0		1	0	0	1	0
1	66	1	1	5	0	0		1		1	1	1
2	54	0	2	5	0	0		1	0	0	1	1
1	17	0	3	3	0	0		0	0	1	1	0
1	53	0	3	3	0	0		0	0	0	1	0
2	24	1	3	2	0	0	0	0	0	0	1	1
2	16	0	1	5	0	0		1	0	0	0	0
2	14	0	2	3	0	0		1	0	0	1	1
2	71	1	1	4	0	0	0	1	0	0	1	1
2	30	0	2	2	0	0		1	0	0	1	1
1	14	0	1	2	0	0		1	0	0	1	1
1	16	0	3	2	0	0		1	0	0	1	1
1	29	1	1	3	0	0	0	1	1	0
1	17	1	3	3	0	0	0	1	0	0	0	0
2	14	0	3	3	1	0		1	1	0	0	0
2	76	0	1	3	0	0		1	0	0	1	1
2	17	0	3	2	0	0		1	0	0	1	0
2	29	1	4	4	0	0	0	1	1	0	1	1
2	16	0	3	4	0	0		1	0	0	1	1
2	15	0	1	3	0	0		0	1	0	1	0
2	84	0	2	2	0	0		0	1	0	1	1
1	23	0	1	4	0	0		0	0	0	1	0
1	17	0	1	4	0	0		1	0	0	1	1
1	17	0	2	1	0	0		1	0	0	1	1
2	50	1	3	2	0	0	0	1	0	0	1	1
1	35	1	1	3	0	0	0	1	0	0	1	1
2	22	0	1	4	0	0		1	1	0	1	1
1	32	1	1	3	0	0	0	1	0	0	1	0
2	52	0	3	2	0	0		1	1	0	1	1
2	36	1	3	1	0	0	0	1	0	0	1	1
1	24	0	1	3	0	0		0	1	0	1	0
1	20	1	3	4	0	0	0	1	0	0	1	1
1	19	0	2	1	0	0		1	0	0	1	1
1	16	0	3	3	0	0		1	0	0	1	0
2	16	0	3	3	0	0		1	0	0	1	0
1	17	0	1	4	0	0		0	0	0	1	0
1	57	0	3	3	0	0		1	0	1	1	1
2	30	1	3	5	0	0	1	0	0	0	1	1
1	16	0	1	1	0	0		1	0	0	1	0
1	16	0	3	4	0	1		1	0	0	1	1
2	46	1	1	4	0	0	0	1	0	0	1	0
2	57	1	1	4	0	0	0	1	1	0	1	1
2	65	1	1	3	0	0	0	1	0	0	1	1
2	30	1	1	5	0	0	0	1	0	0	1	1
2	30	1	3	1	0	0	0	1	0	0	1	1
2	19	1	2	2	0	0	0	0	1	1	1	1
1	14	0	1	3	1	0		1	1	0	0	0
2	45	0	1	5	0	0		1	0	0	1	1
2	14	0	1	3	0	0		1	0	0	0	0
2	74	0	3	2	0	0		1	0	0	1	1
2	32	1	3	5	0	0	0	1	0	0	1	1
2	81	0	1	3	0	0		0	0	0	1	1
2	16	0	1	5	0	0		1	0	0	1	1
2	25	0	3	2	0	0		0	1	0	1	1
2	57	1	1	5	0	0	0	0	0	0	1	1
1	24	1	1	5	0	0	0	0	0	0	1	1
2	26	1	1	3	0	0	1	0	0	0	1	1
2	52	1	1	5	0	0	0	0	0	0	1	1
1	35	1	1	5	0	0	0	1	0	0	1	1
1	15	0	3	3	0	0		0	0	0	1	1
1	30	1	1	4	0	0	0	1	0	0	1	0
1	14	0	3	3	0	0		1	0	0	1	1
1	26	1	5	3	0	0	0	0	0	0	1	0
1	14	0	1	4	0	0		0	0	0	1	1
2	14	0	2	5	0	0		0	0	0	1	1
2	38	1	1	3	0	0	0	1	0	0	1	1
2	15	0	1	3	0	0		1	1	0	0	0
1	16	0	1	3	0	0		1	1	0	0	0
1	24	0	3	2	0	0		1	0	0	1	1
1	56	0	3	2	0	0		1		0	1	1
2	35	1	2	2	0	0	1	1	0	0	1	1
2	15	0	2	1	0	0		1	0	0	1	1
1	29	0	1	5	1	1		0	0	0	1	1
2	46	1	3	5	0	0	0	1	0	0	1	1
1	28	1	2	4	0	0	0	0	0	0	1	0
2	17	0	1	4	0	0		1	0	0	1	1
1	17	0	3	5	0	0		0	0	1	1	0
2	33	1	1	2	0	0	0	1	0	0	1	1
1	44	1	3	3	1	0	0	1	1	0	1	1
2	40	1	1	4	1	0	1	0	1	0	1	1
2	17	0	3	5	0	0		0	0	0	1	1
1	15	0	3	4	0	0		1	0	0	1	1
2	69	0	1	3	0	0		1	0	0	1	0
2	19	1	4	2	0	0	0	1	0	0	1	1
2	15	0	3	3	1	0		1	0	0	1	1
1	22	1	1	5	0	0	0	0	0	0	0	0
2	15	0	3	2	0	0		0	1	0	1	0
2	72	0	1	4	0	0		1	1	0	1	1
2	30	1	3	2	0	0	0	0	0	0	1	1
1	27	1	1	4	0	0	0	0	1	0	1	1
2	30	1	3	3	0	0	0	1	0	0	1	1
2	58	0	1	3	0	0		0	0	0	1	0
2	52	1	1	4	0	0	0	1	0	0	1	1
2	54	1	3	3	0	0	0	1	0	0	1	1
2	32	0	3	3	0	0		1	1	1	1	1
2	23	1	3	5	0	0	0	0	0	0	1	1
1	29	0	3	5	0	0		1	0	0	1	0
1	78	0	3	2	0	0		1	0	0	1	1
2	55	1	1	3	0	0	0	1	0	0	1	1
1	35	1	3	1	0	0	0	0	0	0	1	1
2	15	0	1	5	1	0		1	1	0	1	1
2	17	0	3	2	0	0		1	1	0	0	0
1	17	0	3	1	0	0		0	0	0	1	0
2	27	1	2	3	0	0	0	1	0	0	0	0
1	15	0	4	2	0	0		1	1	0	0	0
2	27	1	3	5	0	0	0	1	1	0	1	1
1	38	1	1	4	0	0	0	0	0	0	1	0
2	62	0	2	5	0	0		1	1	0	1	1
2	35	0	3	5	0	0		0	1	0	1	1
2	17	0	3	3	1	0		1	0	0	1	1
2	34	1	1	2	0	0	0	1	0	0	1	1
1	64	0	1	1	0	0		1	1	0	1	1
1	40	1	3	1	0	0	0	1	0	0	1	1
2	75	1	3	5	0	0	0	1		0	1	1
2	36	0	4	2	0	0		0	1	0	1	1
1	36	1	3	3	0	0	0	1	0	0	1	1
1	33	1	1	3	0	0	0	1	0	1	1	0
2	16	0	3	5	0	0		1	0	0	1	1
2	46	1	3	3	0	0	0	1	1	0	1	1
2	68	1	3	5	0	0	0	1	1	0	1	1
2	16	0	3	5	0	0		1	0	0	1	1
2	28	1	1	3	0	0	0	0	0	0	1	0
1	33	1	3	3	0	0	0	0	0	0	1	1
2	16	0	1	1	0	0		1	0	0	1	1
1	59	1	1	3	0	0	0	0	0	0	1	1
1	91	0	2	2	0	1		0	0	0	1	1
2	16	0	3	5	0	0		0	1	0	1	0
1	28	1	1	4	0	0	0	1	0	0	1	1
2	28	1	1	3	0	0	0	1	0	0	1	1
2	29	1	1	2	0	0	0	0	1	0	1	0
1	19	0	3	3	0	0		1	0	0	1	1
1	36	1	2	2	0	0	0	0		0	1	1
2	23	1	3	5	0	0	1	1	0	0	1	1
1	64	0	1	4	0	0		1	0	0	1	1
2	54	1	1	3	0	0	0	1	0	0	1	1
2	68	1	3	2	0	0	0	1	0	0	1	1
2	38	0	3	3	0	0		1	0	0	1	1
2	15	0	2	2	0	0		0	0	0	1	1
1	64	1	1	5	0	0	0	0	0	0	1	1
2	55	1	3	1	0	0	0	1	0	0	1	1
2	15	0	2	5	0	0		1	0	0	1	1
2	76	0	1	2	0	0		1	1	0	1	1
2	17	0	1	1	0	0		0	1	0	1	0
1	32	1	2	5	0	0	0	1	0	0	1	1
1	76	1	1	2	0		0	1	0	0	1	0
1	21	0	3	3	0	0		1	0	0	1	0
1	53	0	3	2	0	0		0	0	0	1	1
1	58	0	2	5	0	0		0	1	1	1	1
2	23	1	1	3	0	0	1	0	1	0	1	1
2	66	1	3	2	0	0	0	1	1	0	1	1
2	23	1	3	5	0	0	0	1	0	0	1	1
1	71	1	3	5	0	0	0	1	0	0	1	1
2	18	1	1	4	0	0	0	1	1	0	1	1
2	42	1	3	3	0	0	0	1		0	1	1
1	31	1	1	3	0	0	0	1	0	0	1	1
1	17	0	1	2	0	0		1	0	0	0	0
1	14	0	4	4	0	0		0	1	0	0	0
1	42	0	3	3	0	0		0	0	0	1	1
2	43	1	1	3	0	0	0	1	0	0	1	1
2	50	1	1	3	0	0	1	0	1	0	0	0
2	26	0	3	1	0	0		1	1	1	0	0
2	17	1	3	3	1	0	1	1	1	0	1	1
2	20	1	1	3	0	0	1	1	0	0	1	0
1	16	0	3	4	0	0		1	0	0	1	1
1	50	1	1	2	0	0	0	1	0	0	1	1
2	25	1	3	5	0	0	0	1	1	0	1	0
1	54	1	3	2	0	0	1	0	1	0	1	1
2	17	0	1	2	0	0		1	1	0	1	1
2	47	0	2	5	0	0		1	0	0	1	0
1	15	0	3	1	0	0		1	0	0	1	1
2	38	1	1	2	0	0	0	1	1	0	1	1
2	15	1	1	4	0	0	0	0	0	0	1	1
2	49	0	1	1	0	0		1	0	0	1	1
2	14	0	1	2	0	0		0	1	0	1	1
2	16	0	3	2	0	0		1	0	0	1	1
2	28	1	2	3	0	0	0	1	0	0	1	1
1	17	0	1	2	0	0		0	0	0	1	0
2	69	0	1	4	0	0		0	1	0	1	1
1	16	0	3	3	0	0		1	0	0	1	1
2	46	1	1	3	0	0	0	1	0	0	1	1
1	14	0	3	2	0	0		1	0	0	0	0
2	72	1	99	3	0	0	0	1	0	0	1	1
1	16	0	2	2	0	0		1	0	0	0	0
2	38	0	1	3	0	0		0	1	0	1	0
2	75	0	1	3	0	0		1	1	0	1	1
2	60	0	3	1	0	0		1	0	0	1	1
2	60	1	2	2	0	1	0	1	1	0	1	1
2	43	1	3	2	0	0	0	1	1	0	1	1
1	34	1	3	3	0	0	0	1	0	0	1	1
2	25	1	1	2	0	0	0	1	1	0	1	1
1	14	0	1	3	0	0		0	0	0	1	1
2	15	0	2	3	0	0		1	0	0	1	0
1	18	0	2	5	0	0		0	1	0	1	1
2	29	1	2	3	0	0	0	0	0	0	1	1
2	46	0	1	3	0	0		0	1	0	1	1
2	59	1	1	3	0	0	0	1	0	0	1	1
1	57	1	3	2	0	0	0	0	0	0	1	0
2	30	1	1	4	0	0	0	1	0	0	1	1
2	51	1	3	4	0	0	0	0	0	0	1	0
2	25	1	3	1	0	0	0	0	0	0	1	1
1	16	0	1	4	0	0		1	0	0	1	1
2	16	0	2	1	0	0		0	1	0	1	1
2	15	0	2	3	1	0		1	0	0	1	0
1	43	1	1	3	0	0	0	1	0	0	1	1
2	28	1	3	3	0	0	0	1	0	0	1	1
1	21	0	2	3	1	0		0	1	1	0	0
2	23	0	1	3	0	0		1	0	0	1	1
1	60	0	2	5	0	0		1	0	0	1	1
1	99	0	3	2	0	0		0	1	0	1	1
2	36	1	3	3	0	0	0	1	0	0	1	1
1	17	0	3	1	0	0		0	0	0	1	1
2	33	1	1	4	0	0	0	1	1	0	1	0
1	38	1	1	2	0	0	0	1	0	0	1	1
2	23	1	3	2	0	0	0	1	0	0	1	1
1	59	0	1	3	0	0		0	1	0	0	0
2	75	1	1	3	0	0	0	1	1	0	1	1
1	33	1	1	2	0	0	0	1	0	0	1	1
1	46	1	3	2	0	0	1	1	1	0	1	1
2	16	0	3	2	1	0		1	0	0	1	1
1	39	1	3	2	0	0	0	0	0	0	1	1
1	48	0	3	4	0	0		0	0	0	1	0
2	24	1	2	3	0	0	0	1	0	0	1	1
1	67	0	1	4	0	0		1	1	0	1	1
2	26	0	3	3	0	0		1	0	0	1	1
2	35	1	3	3	0	0	1	1	0	0	1	1
1	35	1	5	2	0	0	0	0	0	0	0	0
2	30	1	2	2	0	0	0	0		0	1	1
2	48	1	1	4	0	0	0	1	0	0	1	1
1	35	1	1	4	0	0	0	1	0	0	1	1
1	14	0	1	4	0	0		1	0	0	1	1
1	26	1	1	2	0	0	0	1	0	0	1	1
2	41	1	3	3	0	0	0	1	1	0	1	1
2	17	0	4	3	0	1		1	0	0	1	1
2	35	1	3	3	0	0	0	1	1	0	1	1
1	44	0	3	2	0	0		0	0	0	1	1
2	47	0	2	5	0	0		1	0	0	1	1
1	81	0	3	2	0	0		1	0	0	1	1
2	27	1	3	2	0	0	1	0	0	0	1	1
1	18	0	2	3	0	0		1	0	0	1	1
1	56	0	3	3	0	0		0	0	0	1	1
1	65	0	1	4	0	0		0	0	0	1	1
2	26	1	1	4	0	0	0	1	0	0	1	0
2	78	1	3	3	0	0	0	1	1	0	1	1
2	54	1	1	4	0	0	0	0	1	0	1	1
1	26	0	3	3	0	0		1	0	0	1	1
2	15	0	1	3	0	0		1	1	0	1	1
1	15	0	3	2	0	0		1	0	0	0	0
2	47	1	3	4	0	0	0	1	1	0	1	1
2	35	1	3	3	0	0	0	0	1	0	1	0
1	15	0	1	3	0	0		1	0	0	1	1
1	25	1	3	5	0	0	0	1	0	0	0	0
2	14	0	3	4	0	0		1		0	1	0
1	58	0	2	3	0	0		0	1	0	0	0
2	42	0	1	4	0	0		0	0	0	1	0
2	82	0	1	3	0	0		1	0	0	1	1
1	49	0	2	2	0	0		1	0	0	1	1
2	67	1	3	2	0	0	0	1	1	0	1	1
2	26	1	2	3	0	0	0	1	0	0	1	1
2	61	1	1	3	0	0	0	0	0	0	1	1
2	15	0	1	5	0	0		1	0	0	1	0
2	16	0	1	1	0	0		1	0	0	1	1
2	67	0	2	4	0	0		0	1	0	1	0
2	37	1	1	3	0	0	1	0	1	0	1	1
2	57	1	3	1	0	0	0	0	1	0	1	1
1	15	0	3	3	0	0		1	0	0	1	1
1	31	1	1	4	0	0	0	1	1	0	1	1
2	36	1	3	1	0	0	0	1		0	0	0
2	32	1	1	3	0	0	0	0	0	0	1	1
2	82	1	1	4	0	0	0	1	1	0	1	1
1	57	0	3	3	0	0		1	1	0	1	1
2	46	1	3	2	0	0	0	1	1	0	1	1
2	55	1	1	3	0	0	0	1	0	0	1	1
2	71	1	2	3	0	0	0	1	0	0	1	1
1	15	0	3	1	0	0		1	0	0	1	1
1	52	0	3	3	0	0		1	0	0	1	1
2	50	0	3	1	0	0		0	0	0	1	1
2	32	1	1	3	0	0	0	0	0	0	1	1
1	15	0	3	1	0	0		1	1	0	1	1
2	15	0	1	4	0	0		1	1	0	0	0
1	15	0	4	4	0	0		0	1	0	1	1
1	17	0	2	3	0	0		1	0	0	1	0
2	14	0	1	3	0	0		1	0	0	1	1
1	16	0	1	3	0	0		1	0	0	1	0
1	72	1	3	3	0	0	0	1	0	0	1	1
2	22	1	3	2	0	0	0	0	0	0	1	1
1	16	0	3	3	0	0		1	0	0	1	1
2	14	0	3	3	0	0		1	0	0	1	1
2	30	1	1	2	0	0	1	1	0	0	1	1
1	61	1	5	3	0	0	0	0	1	0	1	0
1	39	0	1	3	0	0		0	0	0	1	0
1	21	0	1	4	0	0		0	1	0	1	1
1	16	0	1	2	0	0		1	0	0	1	1
2	44	0	2	2	0	0		1	0	0	1	1
1	28	1	1	3	0	0	0	0	0	0	1	1
1	35	1	3	1	0	0	0	0	0	0	1	0
1	23	0	2	2	0	0		1	0	0	1	1
2	30	0	1	4	0	0		0	1	0	1	1
1	37	1	1	4	0	0	0	0	1	0	1	1
1	42	1	2	1	0	0	0	1	1	1	1	1
2	23	1	3	2	0	0	0	0	0	0	1	1
2	43	1	3	2	0	0	0	1	0	0	1	1
2	46	1	2	3	0	0	0	0	0	0	1	0
2	58	1	3	4	0	0	0	1	1	0	1	1
2	15	0	3	1	0	0		1	0	0	1	1
2	36	1	1	1	0	0	0	1	1	0	1	1
1	14	0	1	2	0	0		1	0	0	1	1
1	14	0	3	4	0	0		1	0	0	1	1
2	15	0	3	1	0	0		1	0	0	1	1
1	70	1	99	3	0	0	0	1	0	0	0	0
2	40	1	4	2	0	0	0	1	0	0	1	1
2	15	0	2	1	0	0		1	0	0	1	1
2	31	1	3	3	0	0	0	1	0	0	0	0
2	25	1	3	2	0	0	0	1	0	0	1	1
1	47	1	3	5	0	0	0	1	0	0	1	1
1	28	0	2	3	0	0		1	1	0	1	1
2	20	0	2	4	0	0		1	0	0	1	0
1	47	1	2	5	0	0	0	1	0	0	0	0
2	47	0	1	1	0	0		1	0	0	1	1
2	24	1	3	1	0	0	1	1	1	0	1	1
2	17	0	4	3	0	0		1	0	0	0	0
1	15	0	1	3	0	0		1		0	0	0
1	72	0	2	3	0	0		1	0	0	1	1
2	47	1	2	3	0	0	0	1	0	0	1	1
2	21	0	3	2	0	0		1	0	0	1	1
2	27	0	3	2	0	0		0		0	1	1
2	27	0	3	3	0	0		0	1	0	1	1
1	17	0	3	1	0	0		0	1	0	1	0
1	51	1	2	3	0	0	0	0	1	0	1	0
1	15	0	1	4	0	0		0	0	0	1	0
1	30	0	1	1	0	0		0	0	0	1	1
2	24	1	2	2	0	0	0	0	1	0	1	1
2	26	1	3	3	0	0	1	1	1	0	0	0
2	33	1	1	3	0	0	0	1	0	0	1	1
1	56	0	1	5	0	0		0	0	0	0	0
1	17	0	1	4	0	0		0	0	0	1	1
2	31	1	3	2	0	0	0	1	0	0	1	1
2	33	0	1	3	0	0		0	1	0	1	1
1	71	0	1	4	0	0		1	0	0	1	0
2	71	0	3	2	0	0		1	0	0	1	1
1	73	0	3	2	0	0		0	0	0	0	0
1	27	1	1	4	0	0	0	1	0	0	1	1
2	14	0	1	3	0	0		0	0	0	0	0
2	63	1	1	4	0	0	0	1	0	0	1	1
1	54	1	2	1	0	0	0	1	0	1	1	0
1	42	1	1	5	0	0	0	0	1	0	1	1
2	46	1	1	3	0	0	0	1	0	0	1	1
2	51	0	2	4	0	0		1	0	0	0	0
2	79	1	3	3	0	0	0	0		0	1	1
1	14	0	1	2	0	0		1	0	0	1	1
1	25	1	1	3	0	0	0	1	0	0	1	0
1	15	1	1	4	1	0	0	0	1	0	0	0
2	14	0	1	4	0	0		1	0	0	1	1
2	42	0	3	5	0	0		1	0	0	1	1
2	14	0	1	5	0	0		1	0	0	1	1
2	27	0	2	3	0	0		1	0	0	1	1
2	16	0	1	3	0	0		1	0	0	0	0
1	54	1	3	2	0	0	0	1	0	0	1	1
2	43	1	3	3	0	0	0	1	1	0	1	1
2	37	1	3	3	0	0	0	0	0	0	1	1
1	31	1	3	1	0	0	0	1	0	0	1	1
2	15	1	3	5	0	0	1	1	1	0	1	0
2	56	0	1	3	0	0		1	0	0	1	0
2	21	1	3	2	0	0	0	0		0	1	1
1	25	1	3	3	0	0	0	1	0	0	0	0
2	29	0	1	3	0	0		1	0	0	1	0
2	60	0	3	2	0	0		1	0	0	1	1
1	77	0	1	4	0	0		1	0	0	1	1
1	14	0	1	2	0	0		1	0	0	1	1
2	38	1	1	4	0	0	0	1	0	0	1	0
2	36	0	3	2	0	0		1	0	0	1	1
2	41	0	3	3	0	0		0	0	1	1	0
1	40	1	3	3	0	0	0	0	0	1	1	0
2	16	0	3	3	0	0		0	1	0	1	0
1	72	1	1	3	0	0	0	1	0	0	1	1
1	20	0	2	2	0	0		1	0	0	1	1
2	84	0	1	4	0	0		1	0	0	1	1
2	61	0	1	4	0	0		1	0	0	1	1
1	74	1	1	4	0	0	0	0	0	0	1	1
2	68	0	1	4	0	0		1	0	0	1	1
2	41	1	1	5	0	0	0	1	0	0	1	1
2	65	1	1	2	0	0	0	1	1	0	1	1
1	18	0	3	3	0	0		1	1	0	0	0
2	52	1	3	1	0	0	0	1	1	0	1	1
2	47	0	1	4	0	0		1	1	0	1	1
1	14	0	3	4	0	0		1	0	0	1	1
2	14	0	1	4	0	0		1	0	0	1	1
2	20	1	3	4	0	0	0	1	0	0	1	1
2	39	1	3	3	0	0	0	0	0	0	1	1
2	25	0	5	2	0	0		1	0	0	1	1
2	66	1	1	3	0	0	0	1	0	0	1	1
2	46	1	3	4	0	0	1	0	1	1	1	1
1	60	1	1	4	0	0	0	0	0	0	1	1
1	34	1	3	3	0	0	0	1	1	0	1	1
2	14	0	3	5	0	0		0	1	0	1	1
1	22	0	1	3	0	0		1	0	0	0	0
2	40	1	1	4	0	0	0	1	0	0	1	1
1	31	1	2	3	0	0	0	1	0	0	1	1
1	42	1	1	3	0	0	0	0	0	0	1	0
2	14	0	3	3	1	0		0	1	0	1	1
1	33	1	3	3	0	0	0	1	0	0	1	1
2	56	1	3	2	0	0	0	1	1	0	1	1
1	81	0	1	3	0	0		1	0	0	1	0
1	28	1	1	3	0	0	0	1	0	0	1	1
1	14	0	1	4	0	0		1	0	0	0	0
2	16	0	2	3	0	0		1	1	0	1	1
2	20	0	3	2	0	0		1	0	0	1	1
1	69	0	2	2	0	0		0	1	0	1	1
1	14	0	5	4	1	0		0	1	0	1	0
1	66	0	1	3	0	0		0	0	0	1	1
1	14	0	2	3	0	0		1	0	0	0	0
2	47	1	1	4	0	0	0	0	1	0	1	1
1	67	1	3	2	0	0	0	0	0	0	1	1
2	14	0	1	5	0	0		1	0	0	1	1
2	27	1	3	3	0	0	0	1	0	0	1	0
2	16	0	2	2	0	0		1	0	0	1	1
2	20	0	3	3	0	0		1	0	0	1	1
1	61	1	1	3	0	0	0	1	0	0	1	1
2	14	0	1	1	0	0		1	0	0	1	1
1	45	1	3	1	0	0	0	1	0	0	1	1
1	39	0	2	3	0	0		1	0	0	0	0
2	32	1	1	4	0	0	0	0	0	0	1	1
1	15	0	3	5	0	0		1	0	0	1	1
1	14	0	2	4	0	0		1	0	0	1	1
2	76	1	1	3	0	0	0	1	0	0	1	1
2	43	1	3	2	0	0	1	1	0	0	1	1
1	19	0	1	3	0	0		1	0	0	1	1
2	56	0	1	3	0	0		1	0	0	1	0
1	34	1	1	4	0	0	0	1	0	0	1	1
1	14	0	1	2	0	0		0	0	0	1	1
1	33	1	3	2	0	0	0	1	0	0	1	0
2	72	1	3	2	0	0	0	0	0	0	1	1
1	54	0	3	2	0	0		1	1	0	0	0
1	30	0	3	1	0	0		1	0	0	1	1
2	48	0	1	2	0	0		0	1	0	1	1
2	20	0	3	5	0	0		0	1	0	1	0
1	46	1	1	5	0	0	0	1	0	0	1	0
2	40	1	3	5	0	0	0	1	0	0	1	1
2	30	1	5	2	0	0	0	0	0	1	1	0
2	41	0	1	4	0	0		0	1	0	1	0
1	62	1	1	3	0	0	0	0	0	0	1	1
1	61	1	1	3	0	0	0	0	1	0	1	1
2	44	1	2	3	0	0	0	1	0	0	1	1
1	61	0	1	4	0	0		0	1	0	1	1
1	20	1	1	4	0	0	0	1	0	0	0	0
1	20	1	2	4	0	0	0	1	0	0	1	0
1	55	1	1	3	0	0	0	1	0	0	1	1
1	14	0	1	3	0	0		0	0	0	0	0
2	59	1	1	4	0	0	0	0	1	0	1	1
1	26	0	2	3	0	0		1	0	1	1	1
1	63	0	1	3	0	0		1	0	0	1	1
2	82	0	3	3	0	0		0		0	1	1
1	17	0	3	3	0	0		1	0	0	1	1
1	23	1	3	3	0	0	0	1	0	0	1	1
1	29	0	1	3	0	0		1	0	0	1	1
1	16	0	3	2	0	0		1	0	0	1	1
2	19	1	3	2		0	0	0	1	0	1	1
2	21	1	1	4	0	0	0	1	0	0	1	1
2	43	0	1	3	0	0		0	0	0	1	1
1	58	1	1	3	0	0	0	1	1	1	1	1
2	15	0	1	4	0	0		1	0	0	1	0
2	60	0	2	2	0	0		0	1	0	1	1
1	23	0	1	3	0	0		1	0	0	1	0
2	22	0	2	3	0	0		0	0	0	1	1
2	35	1	1	4	0	0	0	1	1	0	1	1
1	16	0	1	4	0	0		0	0	0	1	0
2	61	1	2	3	0	0	0	1	0	0	1	1
2	45	1	3	2	0	0	0	1	0	0	1	1
2	39	1	1	4	0	0	0	1	1	0	1	1
1	48	0	3	3	0	0		1	0	0	0	0
1	15	0	3	2	0	0		1	0	0	1	1
2	36	1	3	3	0	0	0	0	1	0	1	1
2	14	0	1	3	0	0		1	0	0	1	1
1	53	1	3	2	0	0	0	1	0	0	1	1
1	14	0	3	3	0	0		1	0	0	1	1
1	39	1	1	3	0	0	0	1	0	0	0	0
1	68	1	1	3	0	0	0	1	0	0	1	0
2	54	0	3	4	0	0		1	0	1	1	1
1	30	0	2	2	0	0		0	0	0	1	1
1	48	1	1	2	0	0	0	1	0	0	1	1
1	57	1	1	4	0	0	0	1	0	0	1	1
1	32	0	3	2	0	0		1	0	0	0	0
2	15	0	2	2	0	1		0	0	0	0	0
2	20	0	1	3	0	0		1	0	0	1	1
2	16	0	1	3	0	0		1	0	0	1	1
2	14	0	3	3	0	0		1	0	0	1	1
2	55	0	3	1	0	0		0	1	0	1	1
1	50	1	1	4	0	0	0	1	0	0	1	0
2	41	1	1	3	0	0	0	1	0	0	1	1
2	35	1	2	3	0	0	0	0	0	0	1	1
1	52	1	1	4	0	0	0	0	1	0	1	1
2	56	0	3	1	0	0		1	1	0	1	1
1	34	1	1	4	0	0	1	1	1	1	1	0
1	40	1	3	2	0	0	0	0	1	0	1	1
2	29	0	1	4	0	0		1	0	0	1	0
2	15	0	3	2	0	0		0	0	0	1	1
2	36	0	3	3	0	0		1	0	0	1	1
2	25	0	1	3	0	0		0	1	0	1	0
2	20	1	3	2	0	0	0	1	0	0	0	0
2	16	0	3	2	0	0		0	1	0	1	1
2	53	0	3	2	0	0		1	1	0	1	0
1	26	1	3	1	0	0	0	1	0	0	1	0
1	64	0	3	2	0	0		0	1	0	1	1
1	16	0	1	3	0	0		1	1	0	0	0
2	49	1	3	1	0	0	0	1	0	0	1	1
1	33	0	1	4	0	0		1	0	0	1	1
2	48	0	1	2	0	0		1	0	0	1	1
2	30	1	1	2	0	0	0	1	1	0	1	1
2	42	1	3	4	0	0	0	1	0	0	1	1
1	65	1	3	2	0	0	0	0	1	0	1	1
1	39	0	1	4	0	0		0	0	0	1	0
2	54	1	1	4	0	0	0	1		0	1	1
1	50	0	1	4	0	0		0	1	0	1	1
1	26	1	2	3	0	0	0	1	0	1	0	0
1	15	0	3	3	0	0		1	0	0	0	0
1	17	0	2	2	0	0		0	0	0	1	1
1	20	0	1	5	0	1		0	0	1	0	0
2	51	1	1	2	0	0	0	1	0	0	1	1
1	16	0	1	2	0	0		1	0	0	1	1
1	44	1	1	4	0	0	0	1	0	0	1	1
2	46	1	1	4	0	0	0	1	0	0	1	0
1	49	1	1	4	0	0	0	1	0	0	1	1
1	15	0	3	5	0	0		0	0	0	1	1
1	22	0	1	4	0	0		1	1	0	1	0
2	39	1	1	4	0	0	0	1	1	0	1	0
1	20	0	3	2	0	0		1	0	0	1	1
2	59	0	3	2	0	0		0	0	0	1	1
2	49	1	1	3	0	0	0	1	0	0	1	0
2	36	1	3	2	0	0	0	1	0	0	1	1
2	35	0	1	3	0	0		1	1	0	1	1
2	16	0	1	4	0	0		1	1	0	1	1
2	25	0	3	3	0	0		1	0	0	1	1
2	58	1	3	4	0	0	0	0	1	0	1	1
1	80	0	3	3	0	0		0	0	0	1	1
1	70	1	1	3	0	0	0	1	1	0	1	1
2	14	0	1	2	0	0		1	0	0	1	1
2	14	0	3	2	0	0		0	0	0	1	0
1	15	0	2	2	0	0		1	0	0	1	0
1	38	0	3	3	0	0		0	0	0	1	0
2	50	1	1	4	0	0	0	0	0	0	1	1
2	61	0	2	4	0	0		0	1	1	1	1
2	21	0	3	2	0	0		0	1	0	1	1
2	27	1	1	4	0	0	0	1	1	0	1	1
1	50	1	3	2	0	0	0	1	0	0	1	1
1	29	1	1	4	0	0	0	0	0	1	0	0
2	70	0	1	4	0	0		0	0	0	1	1
1	51	0	3	5	0	0		1	0	0	1	1
1	49	1	3	2	0	0	0	1	0	0	1	1
2	21	0	1	2	0	0		1	0	0	1	1
2	16	0	3	2	0	0		0	1	0	1	1
2	25	0	2	4	0	0		0	0	0	1	0
2	32	1	1	4	0	0	0	1	0	0	1	1
2	16	0	3	2	0	0		1	0	0	1	1
2	57	0	1	5	0	0		1		0	1	1
2	42	1	1	3	0	0	0	1	0	0	1	1
2	47	0	2	5	0	0		1	0	0	1	1
2	21	1	1	4	0	0	0	0	1	0	1	0
2	15	1	3	2	0	0	0	0	1	0	1	1
2	23	1	2	1	0	0	0	0	0	0	1	1
2	14	0	3	1	0	0		0	0	0	1	0
2	19	1	3	2	1	0	1	1	0	0	1	1
2	52	1	1	4	0	0	0	1	1	0	1	1
1	17	0	1	4	0	0		1	0	0	0	0
2	63	0	2	3	0	0		0	1	0	1	1
1	41	1	1	4	0	0	0	0	0	0	1	1
2	27	1	1	2	0	0	1	1	0	0	0	0
1	14	0	1	3	0	0		1	0	0	1	1
1	18	0	3	2	0	0		1	0	0	1	1
2	48	1	2	5	0	0	0	1	0	0	1	1
2	46	1	3	1	0	0	0	1	1	0	1	1
1	43	1	1	4	0	0	0	0	1	0	1	1
2	14	0	1	2	0	0		1	0	0	1	1
2	16	0	1	4	1	0		1	0	0	1	0
2	17	0	1	4	0	0		0	1	0	1	0
1	14	0	3	3	0	0		1	0	0	1	1
1	26	1	5	2	0	0	0	1	0	0	1	1
1	26	1	3	3	0	0	0	1	0	0	1	1
2	45	1	3	3	0	0	0	1	1	0	1	1
1	38	1	1	3	0	0	0	1	1	1	1	1
1	53	1	1	1	0	0	0	0	0	0	1	1
2	16	0	3	3	0	0		1	0	0	1	0
1	14	0	1	4	0	0		1	0	0	0	0
1	80	1	3	3	0	0	0	1	1	0	1	1
2	76	0	1	4	0	0		0	0	0	1	1
2	16	0	3	5	0	0		0	1	0	1	1
1	15	0	2	2	0	0		0	0	0	1	0
2	47	1	3	4	0	0	0	1	1	0	1	1
1	16	0	1	3	1	0		1	0	0	1	1
1	63	1	1	2	0	0	0	1	0	0	1	1
2	29	1	3	1	0	0	1	1	0	0	1	1
1	69	0	1	4	0	0		0	1	0	1	1
1	51	0	1	4	0	0		1	0	0	1	1
2	14	0	3	4	0	0		1	1	0	1	0
1	31	0	1	3	0	0		1	0	0	1	1
2	78	0	2	2	0	0		1	0	0	1	1
2	14	0	3	3	0	0		1	0	0	1	0
2	68	0	1	4	0	0		1	0	0	1	1
1	17	0	3	2	0	0		1	0	0	0	0
1	23	0	1	3	0	0		0	0	0	1	0
1	15	0	1	4	0	0		1	0	0	1	1
2	47	1	3	2	0	0	0	1	0	0	1	1
1	35	1	3	3	0	0	0	1	0	0	1	1
2	39	0	3	2	0	0		1	0	0	1	1
1	47	0	1	4	0	0		1	0	0	1	1
1	15	0	3	3	0	0		1	0	0	1	1
2	44	1	3	5	0	0	0	1	1	0	1	1
2	22	0	5	2	0	0		0	0	0	1	1
2	34	1	1	4	0	0	0	0	1	0	1	1
2	71	1	1	3	0	0	0	0	1	0	1	1
2	70	0	2	2	0	0		1	1	0	1	1
1	36	1	1	1	0	0	0	0	0	0	1	1
2	17	0	3	4	0	0		1	0	0	1	1
2	14	0	3	2	0	0		0	1	0	1	0
1	45	1	1	4	0	0	0	0	1	0	1	1
2	62	0	2	3	0	0		1	0	0	1	1
1	43	1	3	3	0	0	0	1	0	0	1	1
1	88	0	2	3	0	0		0	1	0	1	1
1	46	1	3	3	0	0	0	1	0	0	1	1
1	62	0	1	3	0	0		1	0	0	1	1
2	43	1	2	4	0	0	0	1	0	0	1	1
1	34	1	1	5	0	0	0	1	0	0	1	1
2	15	0	1	4	0	0		0	1	0	1	1
1	16	0	1	3	0	0		1	0	0	1	1
1	14	0	3	2	0	0		1	0	0	1	1
2	16	0	2	4	0	0		1	0	0	1	0
2	16	0	3	3	0	0		1	1	0	1	1
1	32	1	1	5	0	0	0	1	1	0	1	1
2	43	1	3	3	1	0	0	1	1	0	1	1
2	14	0	3	5	0	0		0	0	0	1	0
1	65	0	2	4	0	0		0	1	0	1	1
1	42	1	2	3	0	0	0	0	0	0	1	1
1	14	0	3	3	0	0		0	0	0	0	0
2	16	0	1	3	0	0		1	0	0	1	0
2	32	1	1	3	0	0	0	0	0	0	1	1
2	70	1	1	4	0	0	0	1	1	0	1	1
2	82	0	3	3	0	0		0	1	0	1	1
2	26	1	3	2	0	0	0	1	1	0	1	1
2	40	1	3	3	0	0	0	0	0	0	1	1
2	49	1	1	2	0	0	0	0	0	0	1	1
2	29	1	2	3	0	0	0	0	0	0	1	0
2	17	0	1	4	0	0		1	1	1	1	1
1	70	1	1	1	0	0	0	1	0	0	1	1
2	15	0	1	3	0	0		1	0	0	1	1
1	15	0	1	4	0	0		1	0	0	1	0
1	14	0	3	3	0	0		1	0	0	1	1
2	27	1	1	4	0	0	0	1	0	0	1	0
1	66	0	1	4	0	0		0	1	0	1	1
2	26	1	1	4	0	0	0	0	1	0	1	1
2	57	1	1	4	0	0	0	1	0	0	1	1
2	24	1	1	4	0	0	0	1	0	0	1	1
2	27	0	2	1	0	0		0	0	1	1	1
2	27	1	1	3	0	0	0	0	1	0	1	1
1	44	1	1	4	0	0	0	0	0	0	1	1
2	23	1	3	2	0	0	1	1	1	1	0	0
1	14	0	2	2	0	1		1	0	0	1	1
1	56	1	3	4	0	0	0	1	1	0	1	1
2	61	0	3	4	0	0		1	0	0	1	1
2	67	1	3	4	0	0	0	1	1	0	1	0
1	46	1	3	4	0	0	0	1	0	0	1	1
1	49	1	1	2	0	0	0	1	0	0	1	1
2	80	0	1	3	0	0		1	0	0	1	0
2	61	0	2	3	0	0		1	1	0	1	1
2	25	0	1	4	0	0		1	1	0	1	1
2	47	1	1	4	0	0	0	1	0	0	1	1
2	76	0	1	3	0	0		0	0	0	1	1
1	38	0	3	5	0	0		1		0	1	1
1	15	0	1	4	0	0		1	0	0	1	1
2	14	0	3	2	0	0		1	0	0	1	1
1	53	0	3	1	0	0		1	0	0	1	1
1	26	0	3	3	0	0		0	0	0	0	0
2	54	1	3	2	0	0	0	0	0	0	0	0
1	14	0	3	3	0	0		1	0	0	1	1
2	25	1	3	2	0	0	0	1	0	0	1	1
1	30	1	1	3	0	0	0	1	0	0	1	1
2	64	0	3	2	0	0		0	1	0	1	1
2	44	1	3	3	0	0	1	1	1	1	1	1
1	37	0	3	3	1	0		0	1	1	0	0
1	42	1	2	2	0	0	0	1	0	0	1	1
2	41	1	3	3	0	0	0	1	0	1	1	0
2	14	0	1	3	0	0		1	0	0	1	1
1	51	1	1	3	0	0	0	1	0	0	1	1
2	29	0	1	3	0	0		0	0	0	1	1
1	23	0	1	4	0	0		0	0	0	0	0
2	42	1	1	5	0	0	0	0	1	0	1	1
2	20	1	3	2	0	0	0	1	0	0	1	1
2	26	1	3	5	0	0	0	0	0	0	1	1
1	33	0	3	2	0	0		1	0	0	1	1
1	71	1	1	4	0	0	0	1	0	0	1	1
2	17	0	2	3	1	0		1	0	1	0	0
2	90	0	3	3	0	0		1	0	0	1	1
2	14	0	1	3	0	0		0	0	0	1	0
1	25	1	3	4	0	0	0	1	0	0	1	1
1	17	0	1	2	0	0		1	1	0	1	1
1	68	1	1	4	0	0	0	1	0	0	1	1
1	51	1	3	4	0	0	0	1	0	0	1	1
1	27	0	1	3	0	0		0	0	0	1	1
1	45	1	1	2	0	0	0	1	0	0	1	1
2	67	0	1	4	0	0		1	1	0	1	1
1	29	1	1	2	0	0	1	0	0	1	1	1
2	45	1	3	5	0	0	1	1	1	0	1	1
2	73	0	1	4	0	0		1	1	0	1	1
1	15	0	3	2	0	0		1		0	0	0
2	34	1	1	3	0	0	0	1	0	0	1	0
1	17	0	3	1	0	0		1	0	0	1	1
1	73	0	3	3	0	0		0	1	0	1	1
1	18	0	1	3	0	0		1	0	1	0	0
2	38	1	1	4	0	0	0	1	1	0	1	1
2	33	1	2	1	0	0	0	0	0	0	1	1
1	70	0	1	4	0	0		0	1	0	1	0
1	16	0	1	4	0	0		1	0	0	1	1
2	27	0	4	1	0	0		1	0	0	1	1
1	62	1	1	3	0	0	0	1	1	0	1	0
2	55	1	3	2	0	0	1	0	0	0	1	1
2	58	1	2	2	0	0	0	1	1	0	1	1
1	34	1	3	3	0	0	0	1	0	0	1	0
2	77	0	1	3	0	0		1	0	0	1	1
1	33	1	3	2	0	0	0	1	0	0	1	1
1	36	1	1	3	0	0	0	0	0	0	1	0
2	51	1	1	3	0	0	0	1	0	0	1	1
2	31	0	1	3	0	0		1	0	0	1	0
2	19	0	4	2	0	0		1	0	0	0	0
2	37	1	2	3	0	0	0	1	0	0	1	0
1	58	1	3	3	0	0	0	1	0	0	1	1
1	72	1	1	3	0	0	0	1	0	0	1	0
2	15	0	1	3	0	0		1	0	0	1	1
1	64	1	1	3	0	0	0	1	0	0	1	0
1	19	0	3	1	0	0		1	0	0	1	1
2	31	1	1	3	0	0	0	1	0	0	1	1
1	17	0	1	2	1	0		1	0	0	1	0
2	65	1	3	4	0	0	0	1	0	0	1	1
2	21	1	1	4	0	0	0	0	1	0	1	0
2	39	1	1	2	0	0	0	1	0	0	1	1
1	51	1	3	2	0	0	0	1	0	1	1	1
2	55	1	3	2	0	0	0	0	1	0	1	1
2	17	0	1	5	0	0		1	1	0	1	1
2	14	0	3	4	1	0		1	1	0	1	1
2	59	1	3	1	0	0	0	1	0	1	1	0
2	16	0	1	4	0	0		0	1	0	1	1
1	22	0	1	3	0	0		1	0	0	1	1
1	45	1	1	4	0	0	0	0	0	0	1	1
2	15	1	4	1	0	0	0	1	0	0	1	0
1	16	0	1	2	0	0		1	0	0	1	1
1	14	0	1	4	0	0		1	0	0	1	1
1	38	0	3	2	0	0		1	0	0	1	0
2	19	1	3	4	0	0	1	1	0	0	1	0
1	15	0	1	1	0	0		1	0	0	1	1
2	73	0	1	4	0	0		1	1	0	1	1
2	59	1	1	4	0	0	1	0	0	0	1	1
2	48	1	3	2	0	0	0	1	0	0	1	1
2	18	0	2	3	0	0		1	0	0	1	1
1	46	0	2	2	0	0		0	0	0	1	0
2	34	0	3	2	0	0		0	0	0	1	1
2	16	0	3	3	0	0		1	0	0	1	1
2	34	1	5	2	0	0	0	0	1	0	1	1
2	17	0	1	3	0	0		1	0	0	1	1
1	42	1	1	3	0	0	0	0	0	0	1	1
1	17	1	3	5	0	0	0	1	0	0	0	0
1	27	1	3	2	0	0	0	0	1	0	1	1
2	17	0	1	4	0	0		0	0	0	1	0
2	46	1	1	4	0	0	0	1	0	0	1	1
2	14	0	3	3	0	0		1	0	0	1	1
1	15	0	1	4	0	0		1	0	0	1	1
1	73	1	1	4	0	0	0	1	0	0	1	1
2	58	0	3	5	0	0		1	0	0	1	1
1	21	0	1	3	0	0		0	0	0	1	1
2	36	1	3	3	0	0	0	0	1	0	1	1
1	24	1	3	5	0	0	0	0	0	0	1	1
1	24	1	1	3	0	0	0	0	0	0	1	1
2	16	0	1	4	0	0		1	1	0	1	0
1	40	1	3	1	0	0	0	1	0	0	1	1
1	39	0	2	3	0	0		0	0	0	0	0
2	51	1	3	1	0	0	0	1	1	0	1	1
1	24	1	2	3	1	0	0	1	0	0	1	1
1	62	1	1	4	0	0	0	0	0	0	1	1
2	28	0	3	3	0	0		0	0	0	1	1
[truncated: 2,608 more rows]

## Sheet: Legend
Legend: sex 1= male 2= female; marital status 0= single/divorced/widow 1= married/living with partner; race 1= White, 2= Black, 3= Brown, 4= others; Brazilian regions 1= North, 2= Northeast, 3= Southeast, 4= South, 5= Midwest; othes items 0= no, 1= yes.
Sex	1	Male
	2	Female
Marital status	0	Single/divorced/widow
	1	Married/living with partner
Race	1	White
	2	Black
	3	Brown
	4	Others
Brazilian regions	1	North
	2	Northeast
	3	Southeast
	4	South
	5	Midwest
Involvement in fights	0	No
	1	Yes
Police detention	0	No
	1	Yes
Domestic violence	0	No
	1	Yes
Social support	0	No
	1	Yes
Depression	0	No
	1	Yes
Alcohol depression	0	No
	1	Yes
Religious affiliation	0	No
	1	Yes
Importance of religion	0	No
	1	Yes
